# Supplementary material for: High molecular weight PE elastomers through 4,4-difluorobenzhydryl substitution in symmetrical α-diimino-nickel ethylene polymerization catalysts
Source: Royal Society of Chemistry journal article supplement (doi:10.1039/d2ra04321a), 2022-01-01
Supplement: d2ra04321a1.pdf [file d2ra04321a1.pdf]

Supplementary Information for

**High molecular weight PE elastomers through 4,4-difluorobenzhydryl substitution in symmetrical  $\alpha$ -diimino-nickel ethylene polymerization catalysts**

Yuting Zheng,<sup>a,b</sup> Shu Jiang,<sup>a,b</sup> Ming Liu,<sup>b</sup> Zhixin Yu,<sup>\*,a</sup> Yanping Ma,<sup>b,c</sup> Gregory A. Solan,<sup>\*,b,c</sup> Wenjuan Zhang,<sup>b,d</sup> Tongling Liang,<sup>b</sup> Wen-Hua Sun<sup>\*,b</sup>

<sup>a</sup> School of Pharmaceutical Sciences, Changchun University of Chinese Medicine, Changchun 130117, China.

<sup>b</sup> Key Laboratory of Engineering Plastics and Beijing National Laboratory for Molecular Sciences, Institute of Chemistry, Chinese Academy of Sciences, Beijing 100190, China.

<sup>c</sup> Department of Chemistry, University of Leicester, University Road, Leicester LE1 7RH, UK.

<sup>d</sup> Beijing Key Laboratory of Clothing Materials R&D and Assessment, Beijing Engineering Research Center of Textile Nanofiber, School of Materials Science and Engineering, Beijing Institute of Fashion Technology, Beijing 100029, China.

| <b>Table of contents</b> |                                                                | <b>page</b> |
|--------------------------|----------------------------------------------------------------|-------------|
| 1.                       | <b>Figure S1</b> <sup>1</sup> H NMR spectrum of <b>L1</b> .    | S3          |
| 2.                       | <b>Figure S2</b> <sup>1</sup> H NMR spectrum of <b>L2</b> .    | S3          |
| 3.                       | <b>Figure S3</b> <sup>1</sup> H NMR spectrum of <b>L3</b> .    | S4          |
| 4.                       | <b>Figure S4</b> <sup>1</sup> H NMR spectrum of <b>L4</b> .    | S4          |
| 5.                       | <b>Figure S5</b> <sup>1</sup> H NMR spectrum of <b>L5</b> .    | S5          |
| 6.                       | <b>Figure S6</b> <sup>13</sup> C NMR spectrum of <b>L1</b> .   | S6          |
| 7.                       | <b>Figure S7</b> <sup>13</sup> C NMR spectrum of <b>L2</b> .   | S6          |
| 8.                       | <b>Figure S8</b> <sup>13</sup> C NMR spectrum of <b>L3</b> .   | S7          |
| 9.                       | <b>Figure S9</b> <sup>13</sup> C NMR spectrum of <b>L4</b> .   | S7          |
| 10.                      | <b>Figure S10</b> <sup>13</sup> C NMR spectrum of <b>L5</b> .  | S8          |
| 11.                      | <b>Figure S11</b> FT-IR spectrum of <b>L1</b> .                | S9          |
| 12.                      | <b>Figure S12</b> FT-IR spectrum of <b>L2</b> .                | S9          |
| 13.                      | <b>Figure S13</b> FT-IR spectrum of <b>L3</b> .                | S10         |
| 14.                      | <b>Figure S14</b> FT-IR spectrum of <b>L4</b> .                | S10         |
| 15.                      | <b>Figure S15</b> FT-IR spectrum of <b>L5</b> .                | S11         |
| 16.                      | <b>Figure S16</b> FT-IR spectrum of <b>Ni1</b> .               | S11         |
| 17.                      | <b>Figure S17</b> FT-IR spectrum of <b>Ni2</b> .               | S12         |
| 18.                      | <b>Figure S18</b> FT-IR spectrum of <b>Ni3</b> .               | S12         |
| 19.                      | <b>Figure S19</b> FT-IR spectrum of <b>Ni4</b> .               | S13         |
| 20.                      | <b>Figure S20</b> FT-IR spectrum of <b>Ni5</b> .               | S13         |
| 21.                      | <b>Figure S21</b> <sup>1</sup> H NMR spectrum of <b>Ni1</b> .  | S14         |
| 22.                      | <b>Figure S22</b> <sup>1</sup> H NMR spectrum of <b>Ni2</b> .  | S14         |
| 23.                      | <b>Figure S23</b> <sup>1</sup> H NMR spectrum of <b>Ni3</b> .  | S15         |
| 24.                      | <b>Figure S24</b> <sup>1</sup> H NMR spectrum of <b>Ni4</b> .  | S15         |
| 25.                      | <b>Figure S25</b> <sup>1</sup> H NMR spectrum of <b>Ni5</b> .  | S16         |
| 26.                      | <b>Figure S26</b> <sup>19</sup> F NMR spectrum of <b>Ni1</b> . | S17         |
| 27.                      | <b>Figure S27</b> <sup>19</sup> F NMR spectrum of <b>Ni2</b> . | S17         |
| 28.                      | <b>Figure S28</b> <sup>19</sup> F NMR spectrum of <b>Ni3</b> . | S18         |

|     |                                                                                                                                                                                                                                  |     |
|-----|----------------------------------------------------------------------------------------------------------------------------------------------------------------------------------------------------------------------------------|-----|
| 29. | <b>Figure S29</b> $^{19}\text{F}$ NMR spectrum of <b>Ni4</b> .                                                                                                                                                                   | S18 |
| 30. | <b>Figure S30</b> $^{19}\text{F}$ NMR spectrum of <b>Ni5</b> .                                                                                                                                                                   | S19 |
| 31. | <b>Figure S31</b> $^{19}\text{F}$ NMR spectra of a) <b>L1</b> and its nickel complex <b>Ni1</b> along with that for b) <b>L3</b> and <b>Ni3</b> .                                                                                | S19 |
| 32. | <b>Figure S32</b> a) GPC traces and b) plots of catalytic activity and molecular weight of the polyethylene produced using <b>Ni2</b> /MAO at different Al:Ni molar ratios (entries 1 – 5, Table 3)                              | S20 |
| 33. | <b>Figure S33</b> a) GPC traces and b) plots of catalytic activity and molecular weight of the polyethylene produced using <b>Ni2</b> /MAO at various run temperatures (entries 2 and 6 – 9, Table 3)                            | S20 |
| 34. | <b>Figure S34</b> a) GPC traces and b) plots of catalytic activity and molecular weight of the polyethylene produced using <b>Ni2</b> /MAO at various time (entries 2 and 10-13, Table 3).                                       | S21 |
| 35. | <b>Figure S35</b> a) GPC traces and b) plots of catalytic activity and molecular weight of the polyethylene produced using <b>Ni1</b> – <b>Ni5</b> in combination with MAO (entries 2 and 16 – 19, Table 3).                     | S21 |
| 36. | <b>Figure S36</b> a) GPC traces and b) plots of catalytic activity and molecular weight of the polyethylene produced using <b>Ni2</b> / EtAlCl <sub>2</sub> at different Al:Ni molar ratios (entries 1-6, Table 4).              | S22 |
| 37. | <b>Figure S37</b> a) GPC traces and b) plots of catalytic activity and molecular weight of the polyethylene produced using <b>Ni2</b> / EtAlCl <sub>2</sub> at different run temperatures (entries 4 and 7-10, Table 4).         | S22 |
| 38. | <b>Figure S38</b> GPC traces and b) plots of catalytic activity and molecular weight of the polyethylene produced using <b>Ni2</b> / EtAlCl <sub>2</sub> at different run time (entries 4 and 11-14, Table 4).                   | S23 |
| 39. | <b>Figure S39</b> a) GPC traces and b) plots of the catalytic activity and molecular weight of the polyethylene produced using <b>Ni1</b> – <b>Ni5</b> in combination with EtAlCl <sub>2</sub> (entries 2 and 17 – 20, Table 4). | S23 |
| 40. | <b>Figure S40</b> $^{13}\text{C}$ NMR spectrum of PE-MAO30Ni2 produced using <b>Ni2</b> /MAO (entry 2, Table 3)                                                                                                                  | S24 |
| 41. | <b>Figure S41</b> $^{13}\text{C}$ NMR spectrum of PE-EtAlCl <sub>2</sub> 40Ni5 produced using <b>Ni5</b> / EtAlCl <sub>2</sub> (entry 21, Table 4)                                                                               | S24 |
| 42. | <b>Figure S42</b> $^{13}\text{C}$ NMR spectrum of PE-Et <sub>2</sub> AlCl40Ni5 produced using <b>Ni5</b> /Et <sub>2</sub> AlCl (entry 23, Table 4)                                                                               | S25 |
| 43. | <b>Figure S43</b> $^{13}\text{C}$ NMR spectrum of PE-EASC40Ni5 produced using <b>Ni5</b> /EASC (entry 24, Table 4)                                                                                                               | S25 |
| 44. | <b>Figure S44</b> Stress-strain recovery tests for samples PE-EtAlCl <sub>2</sub> 40Ni5, PE-EtAlCl <sub>2</sub> 50Ni5, PE-M40Ni5, PE-Et <sub>2</sub> AlCl40Ni5 and PE-EASC40Ni5                                                  | S26 |
| 45. | <b>Table S1</b> Crystal data and structure refinements for <b>L3</b> , <b>Ni1</b> and <b>Ni5</b> .                                                                                                                               | S27 |

**$^1\text{H}$  NMR (400 MHz,  $\text{CDCl}_3$ , 25  $^\circ\text{C}$ ) spectra**

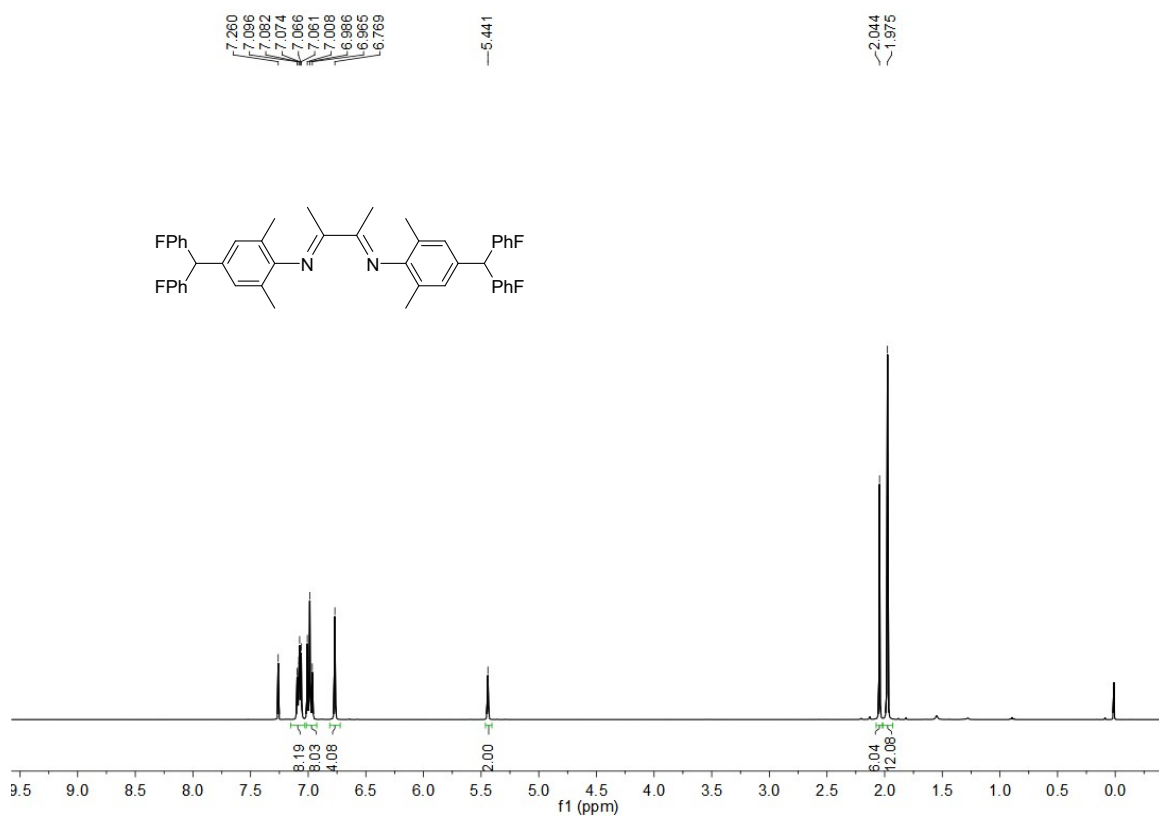

**Figure S1  $^1\text{H}$  NMR spectrum of L1**

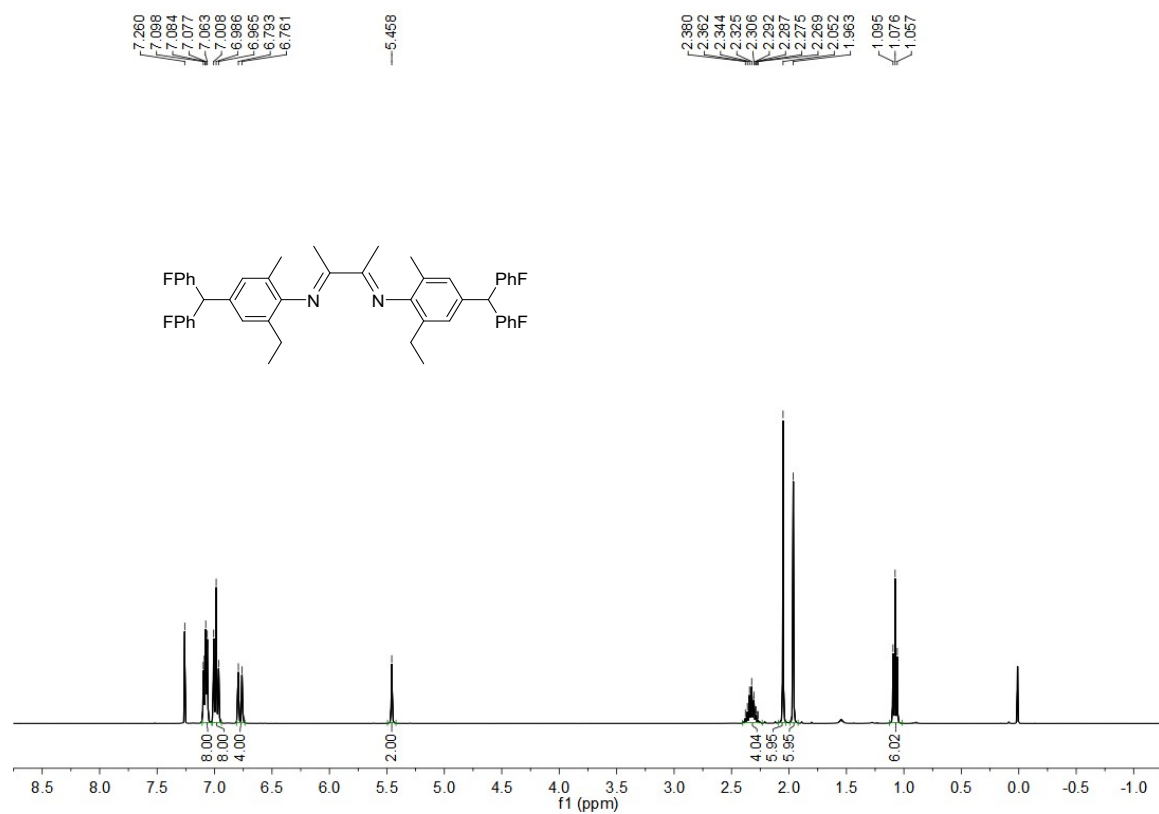

**Figure S2  $^1\text{H}$  NMR spectrum of L2**

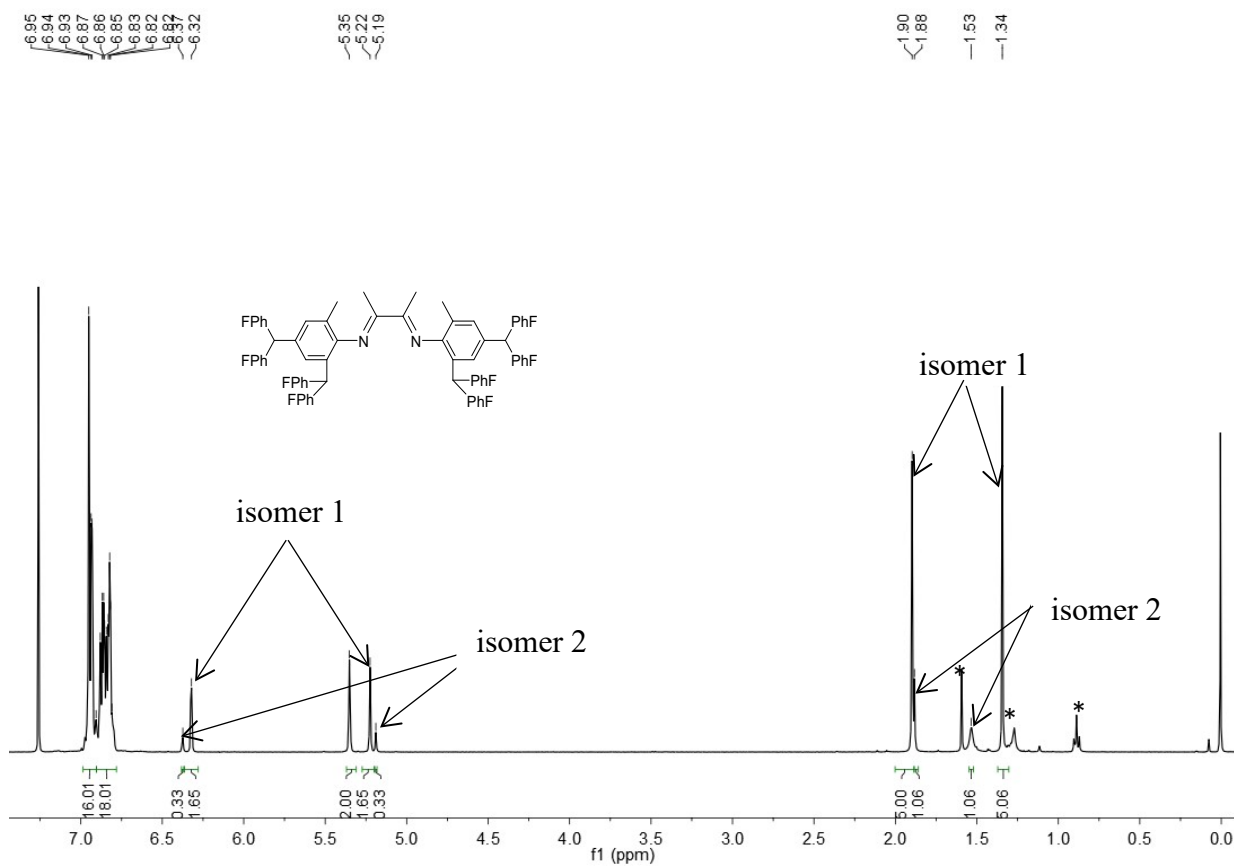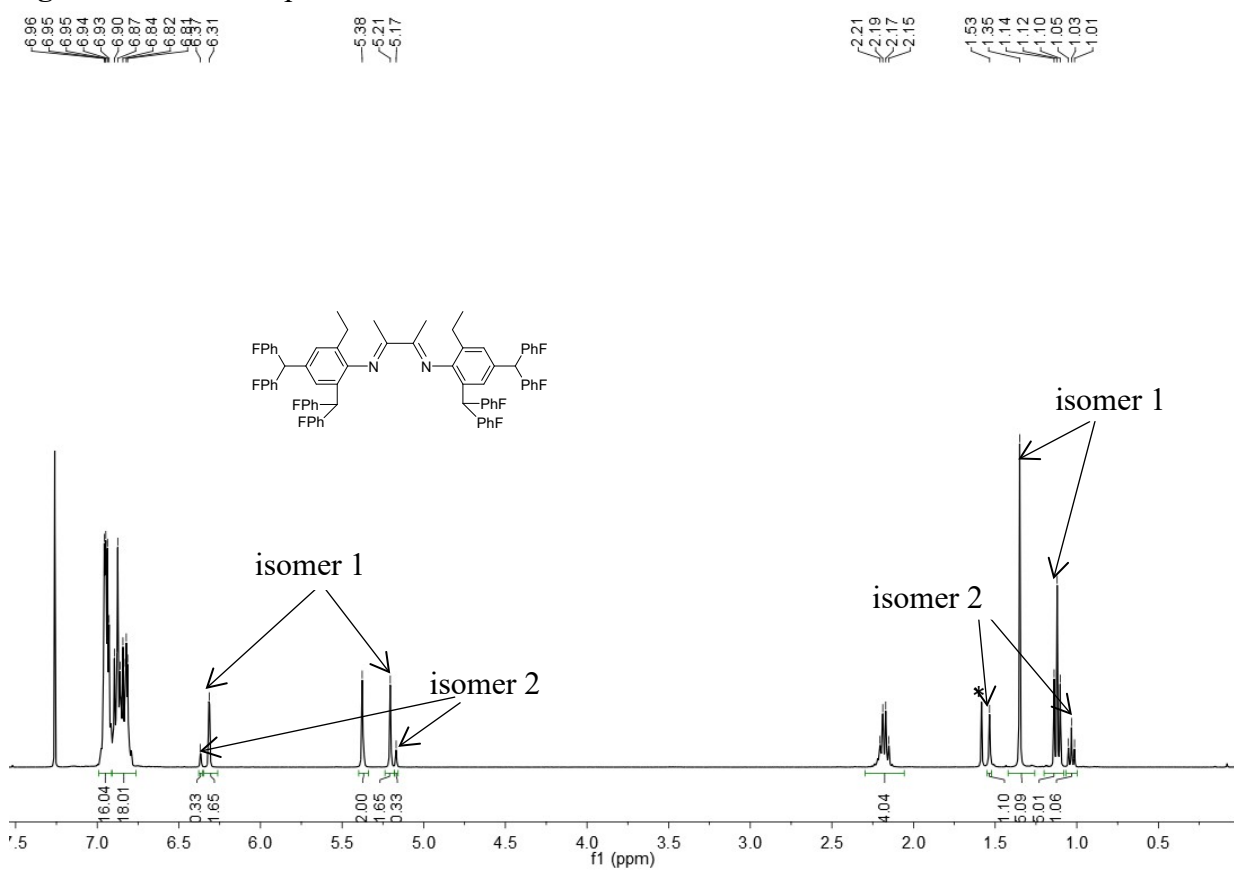

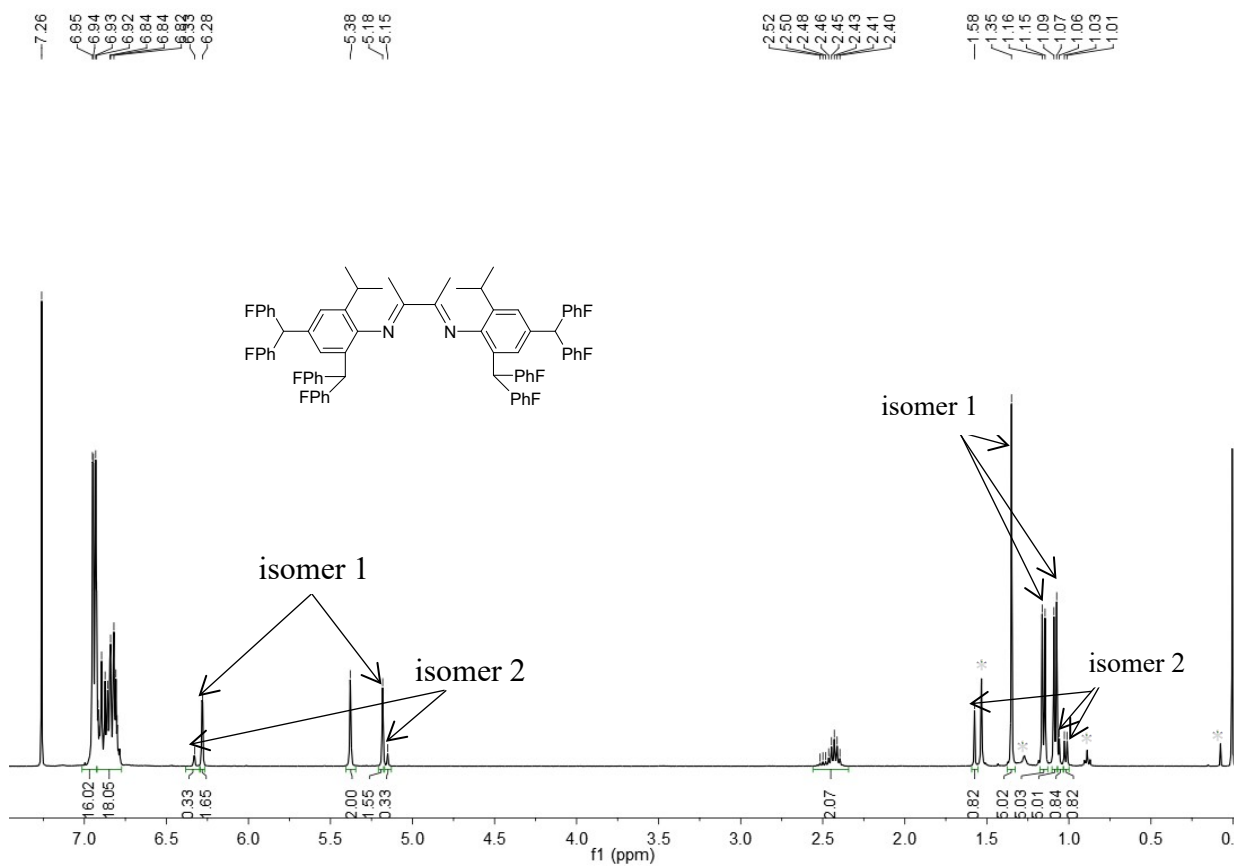

**Figure S5** <sup>1</sup>H NMR spectrum of L5; \* refers to  $\delta$ H for water, n-hexane and grease.

**$^{13}\text{C}$  NMR (100 MHz,  $\text{CDCl}_3$ , 25 °C) spectra**

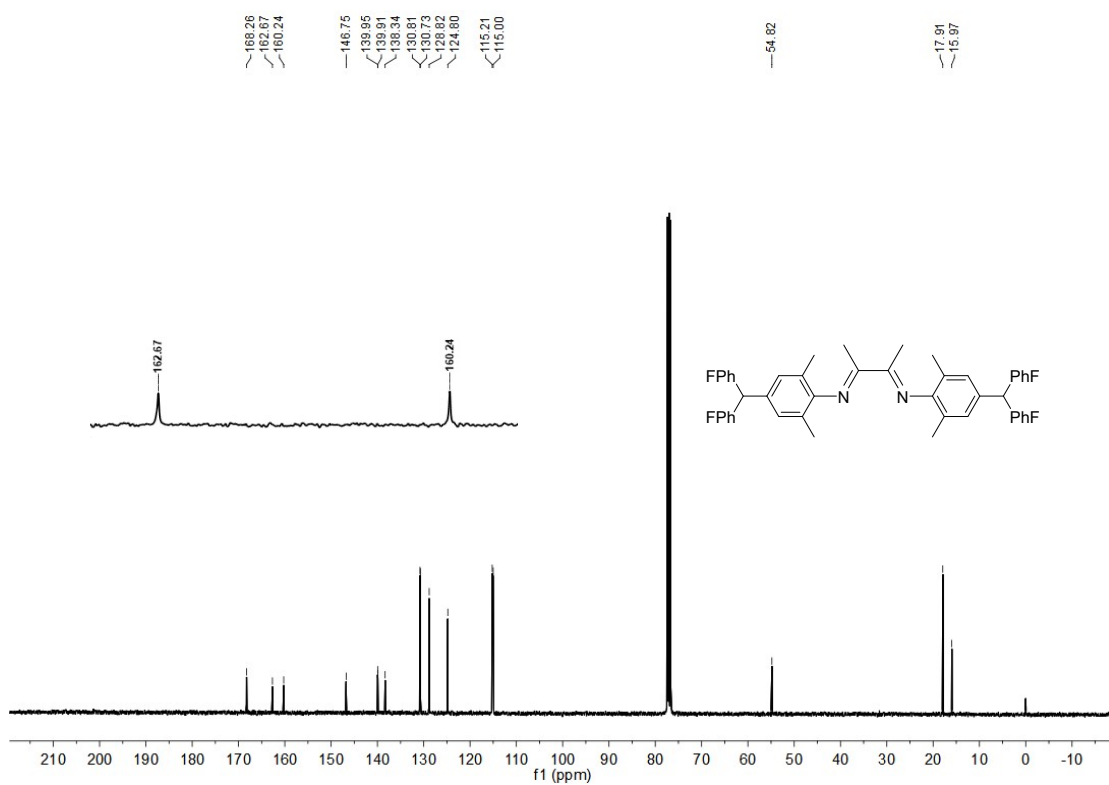

**Figure S6**  $^{13}\text{C}$  NMR spectrum of L1

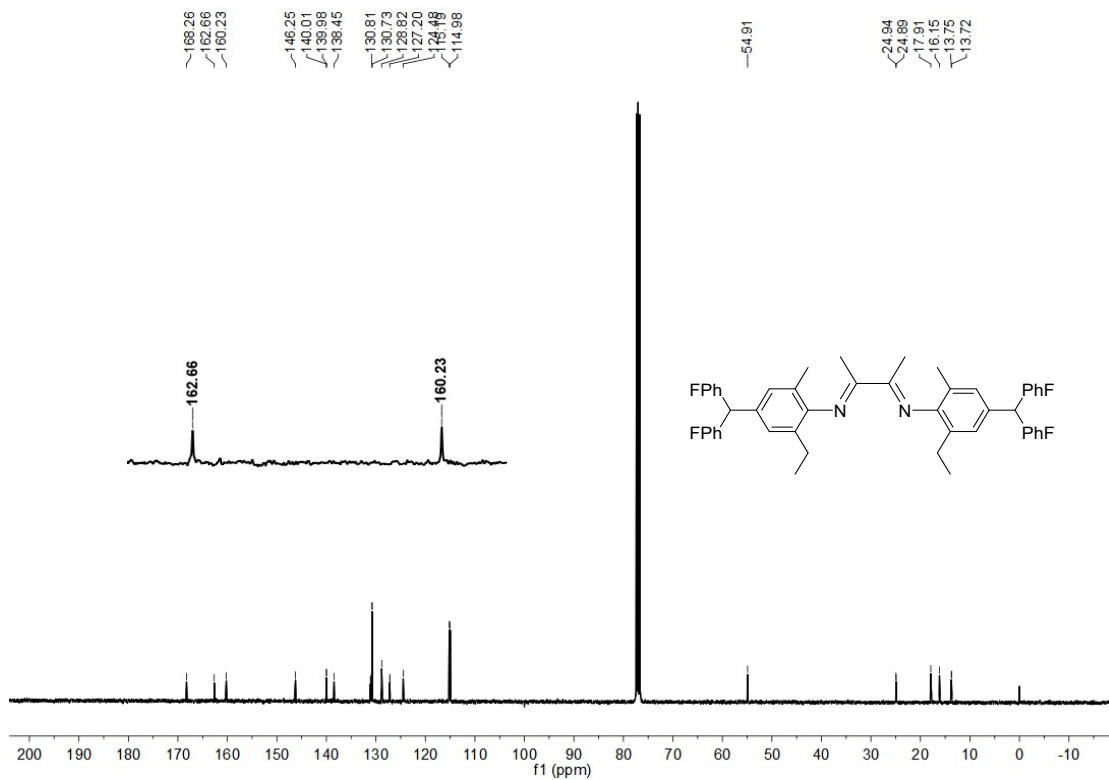

**Figure S7**  $^{13}\text{C}$  NMR spectrum of L2

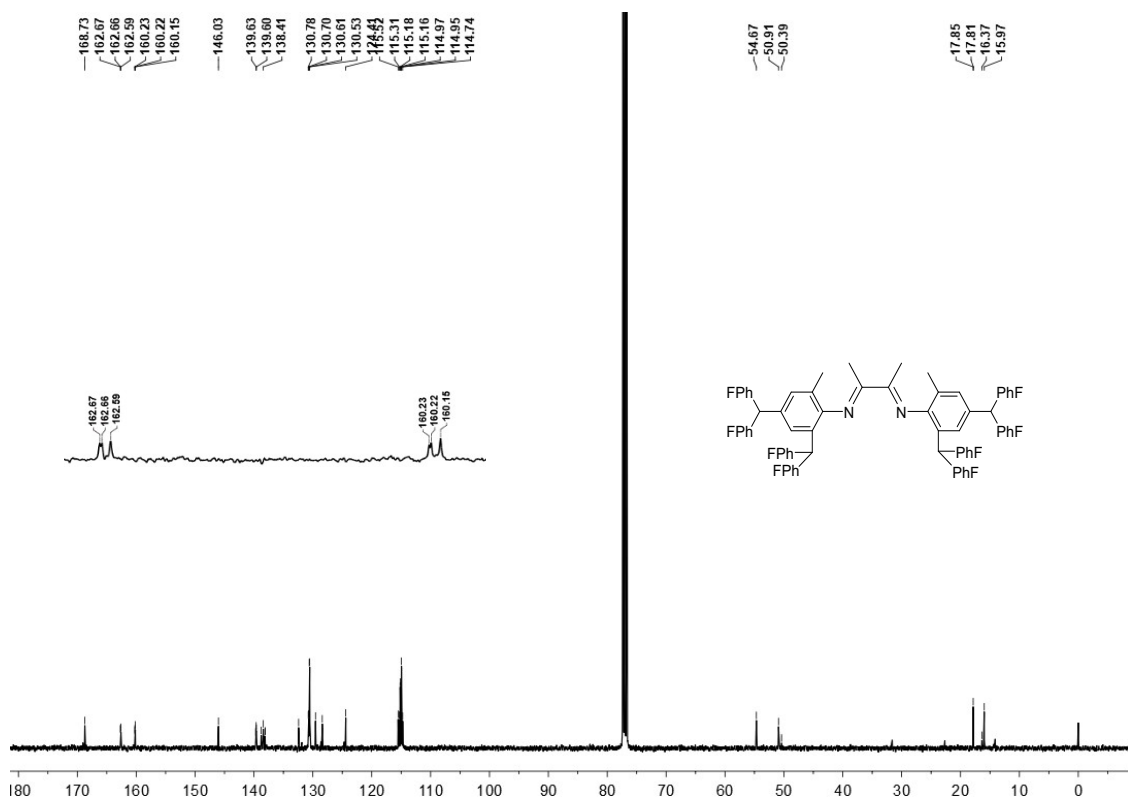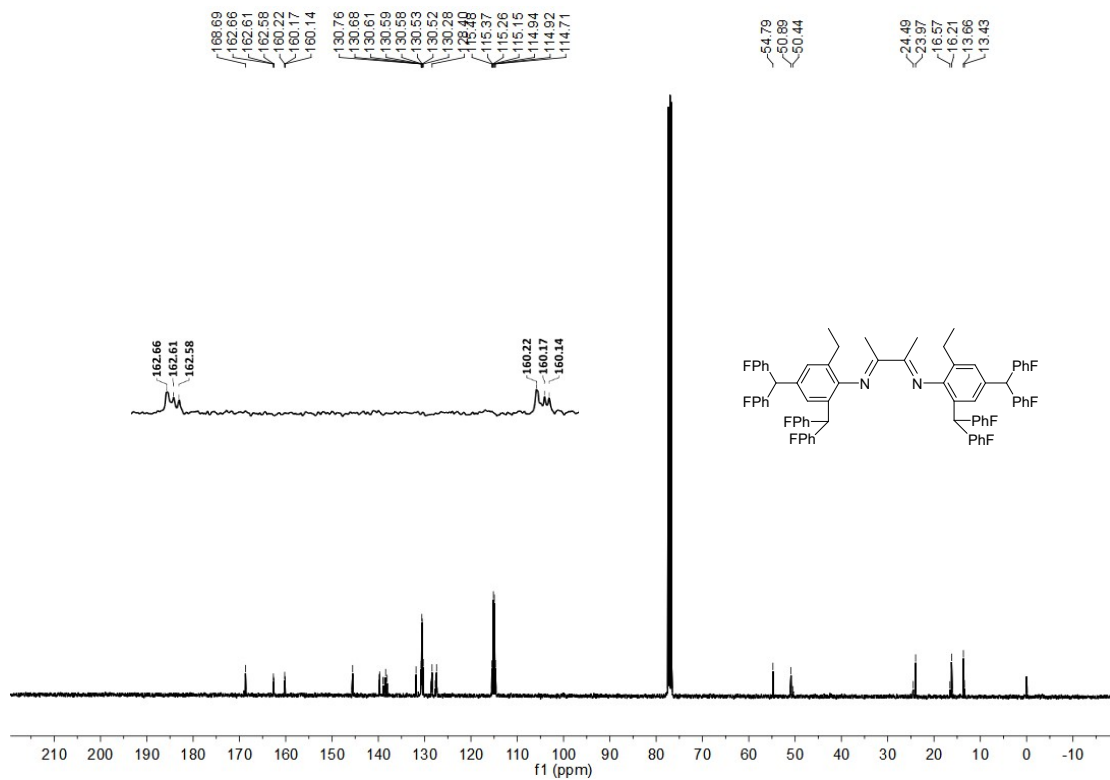

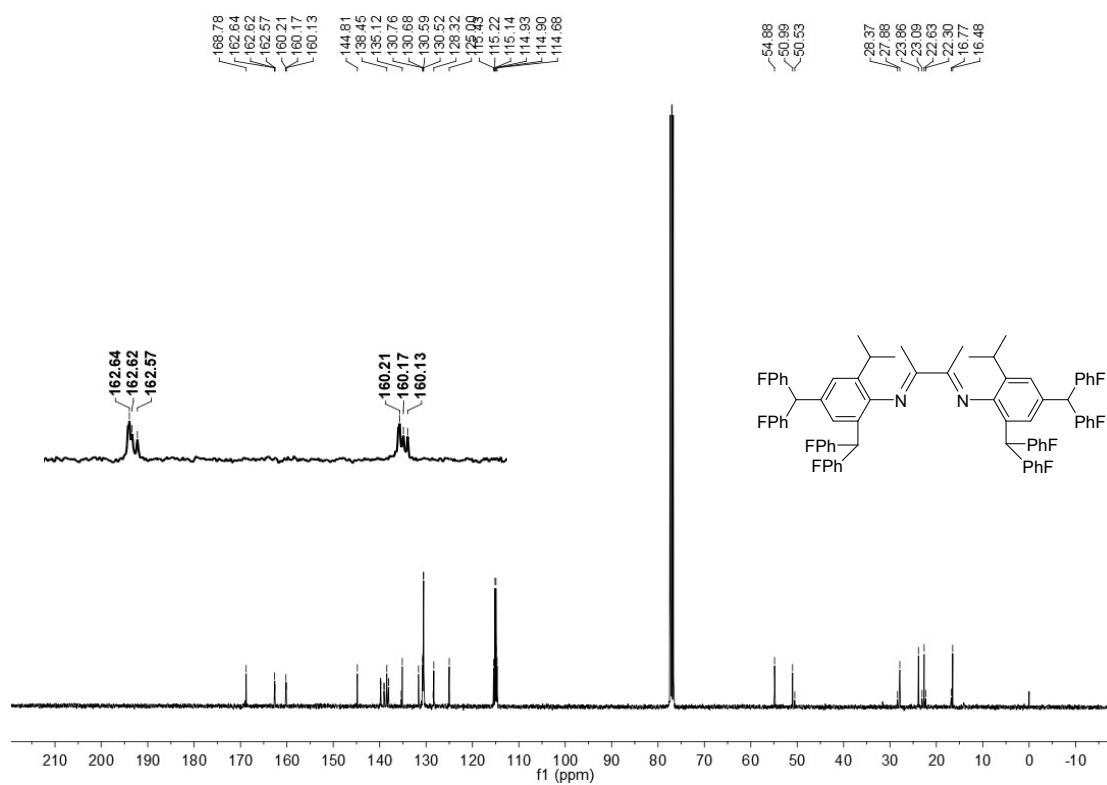

**Figure S10**  $^{13}\text{C}$  NMR spectrum of **L5**



## FT-IR spectra

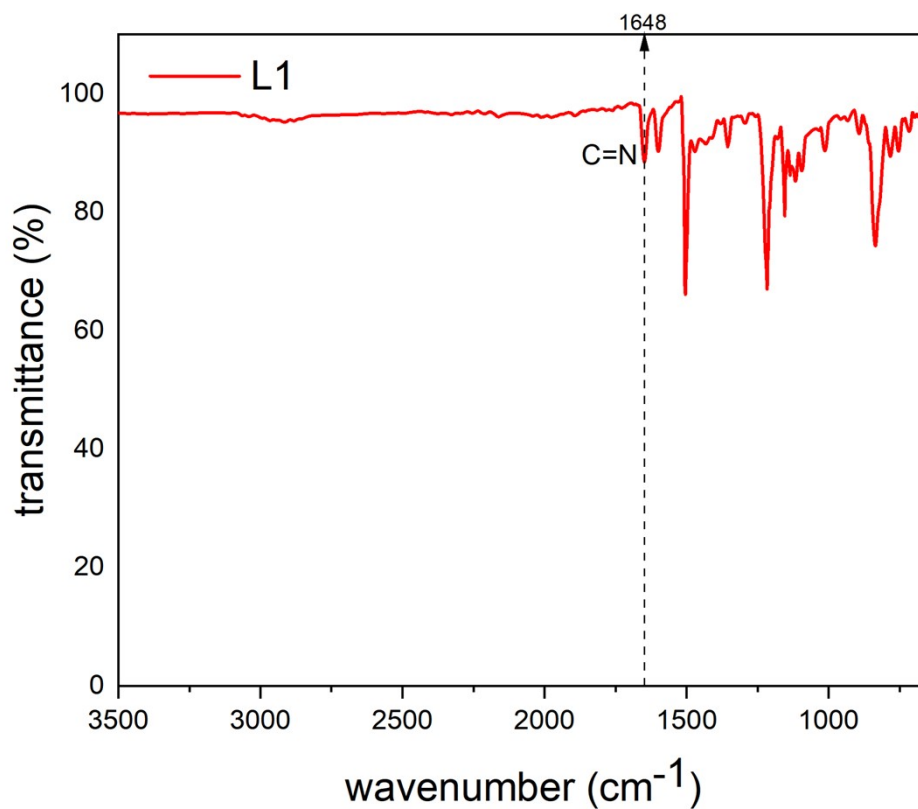

Figure S11 FT-IR spectrum of L1

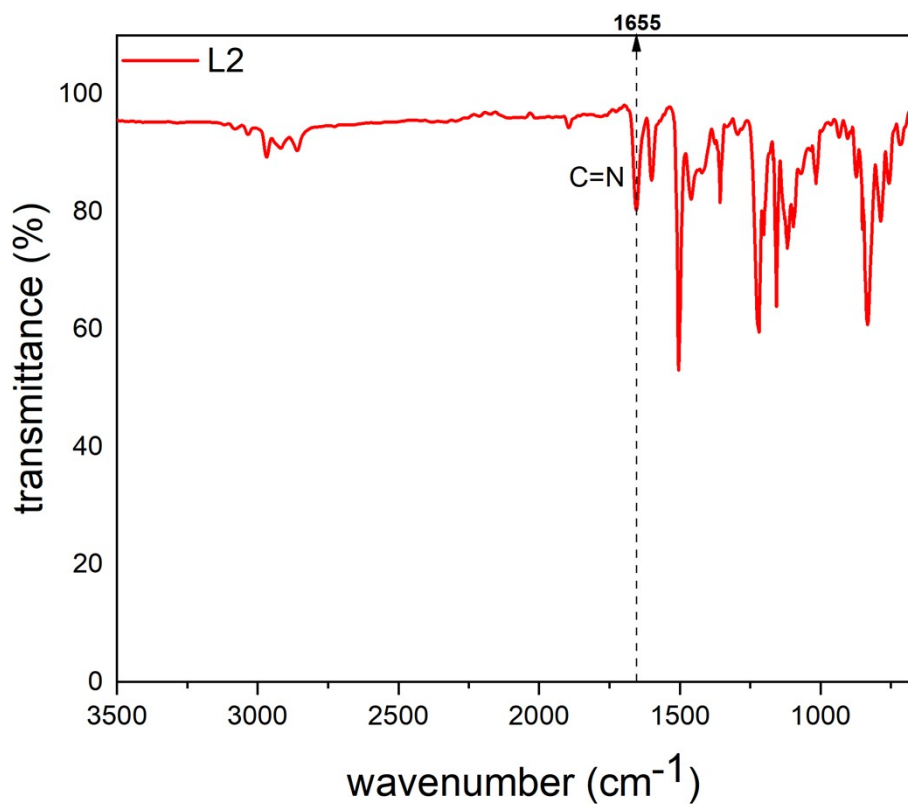

Figure S12 FT-IR spectrum of L2

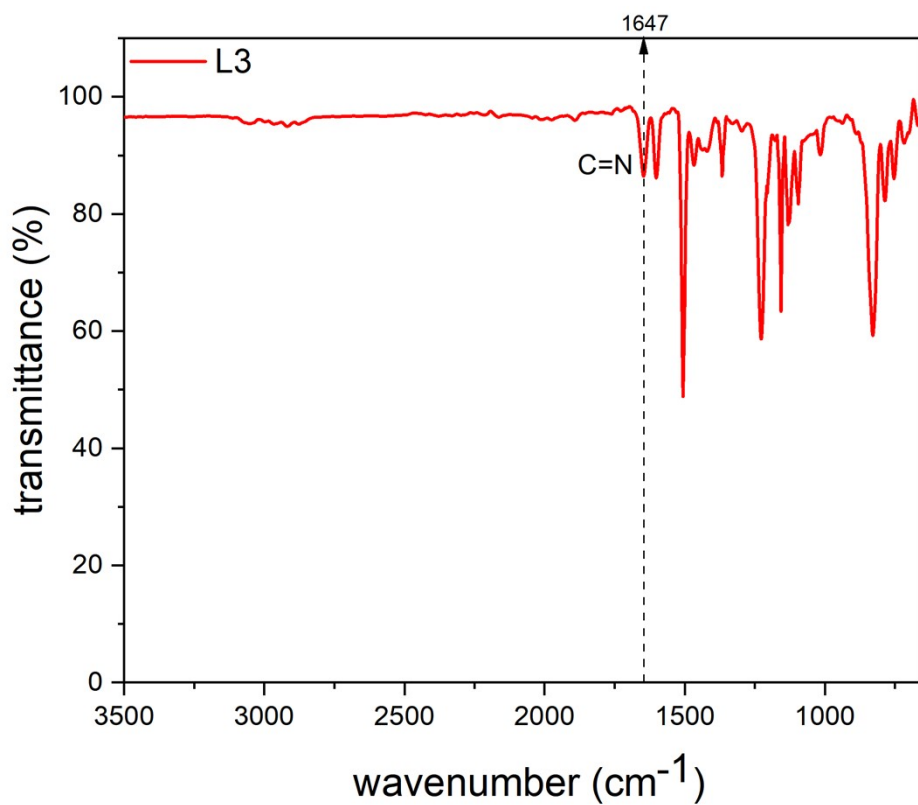

Figure S13 FT-IR spectrum of L3

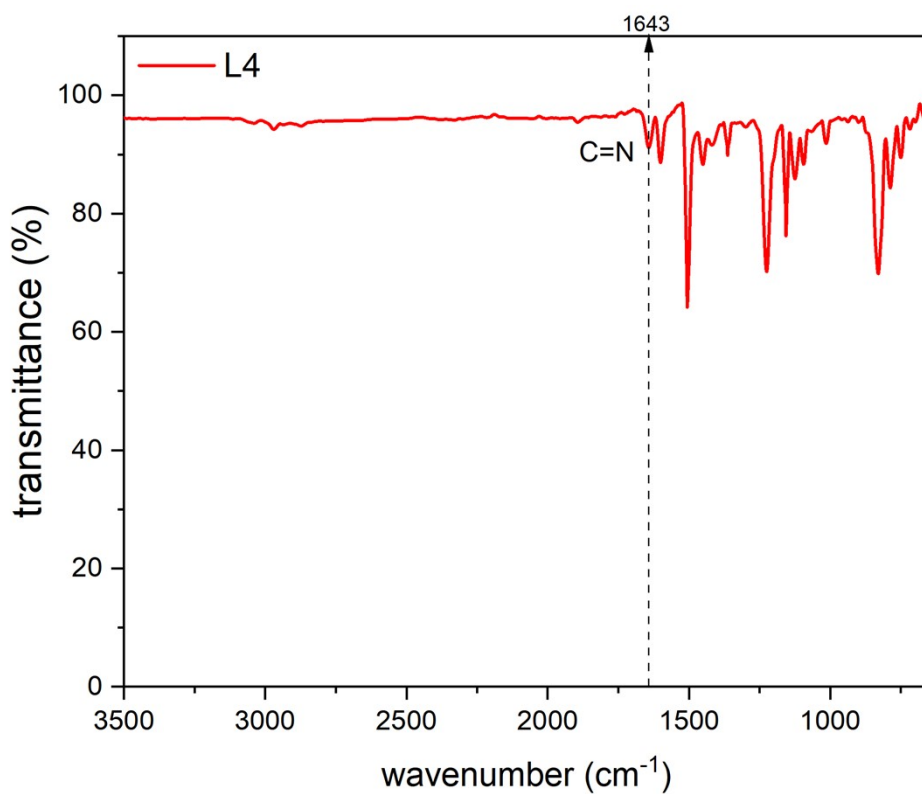

Figure S14 FT-IR spectrum of L4

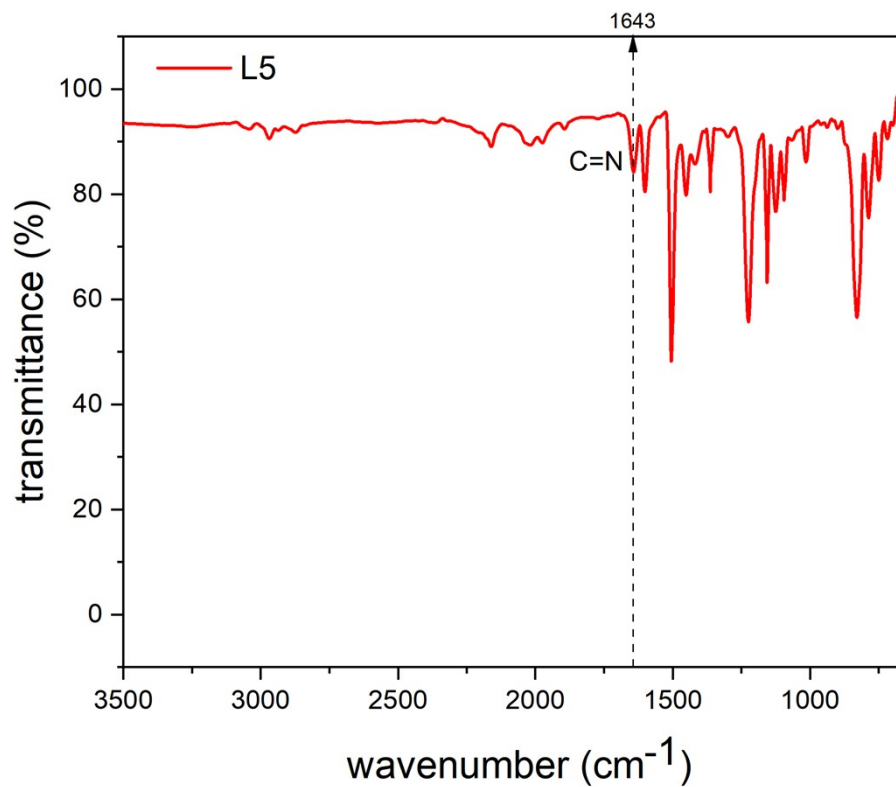

**Figure S15** FT-IR spectrum of **L5**

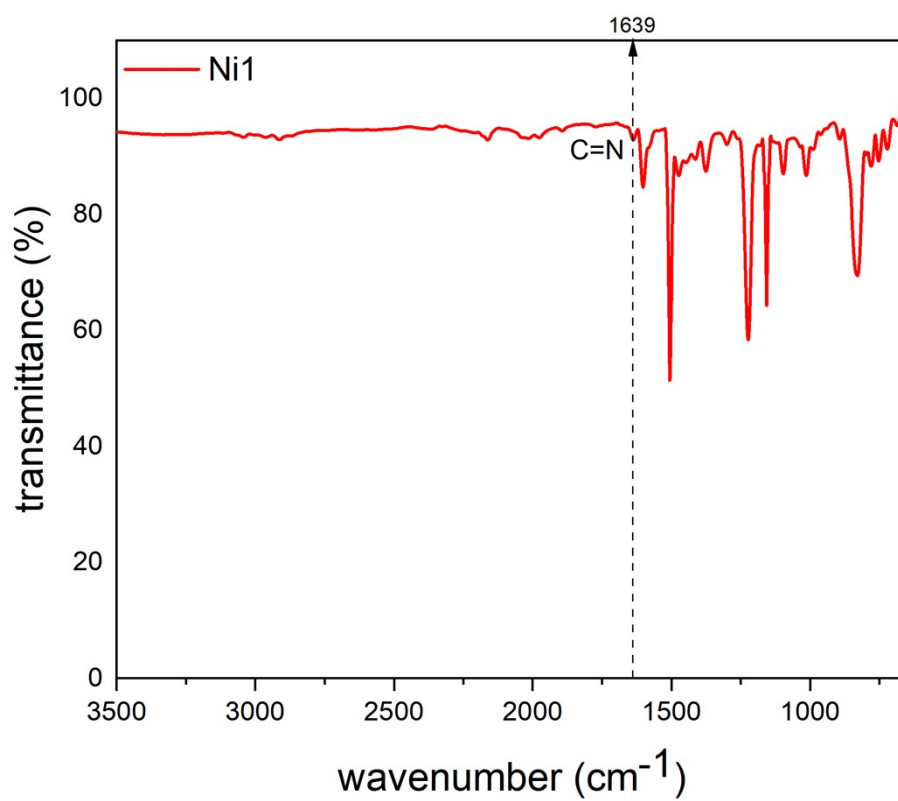

**Figure S16** FT-IR spectrum of **Ni1**

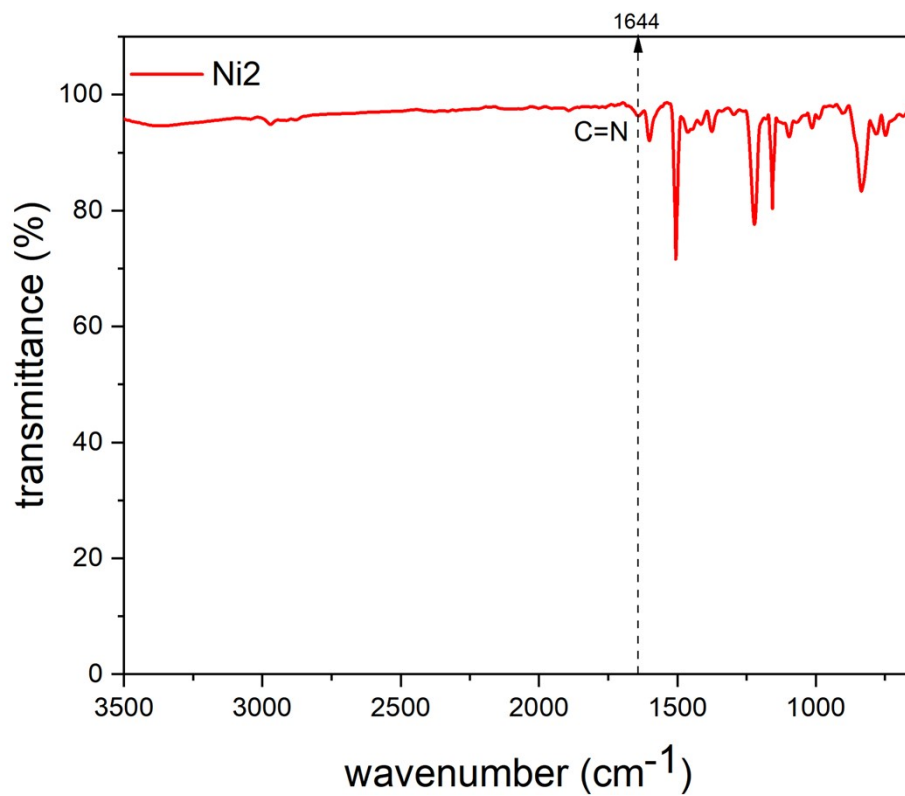

Figure S17 FT-IR spectrum of Ni2

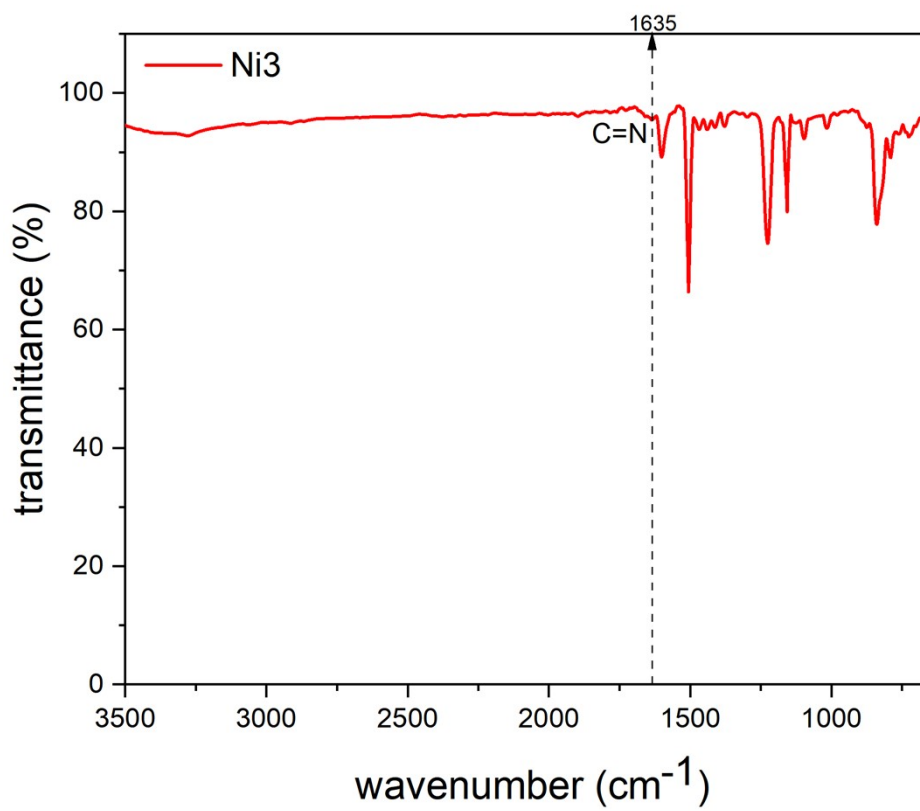

Figure S18 FT-IR spectrum of Ni3

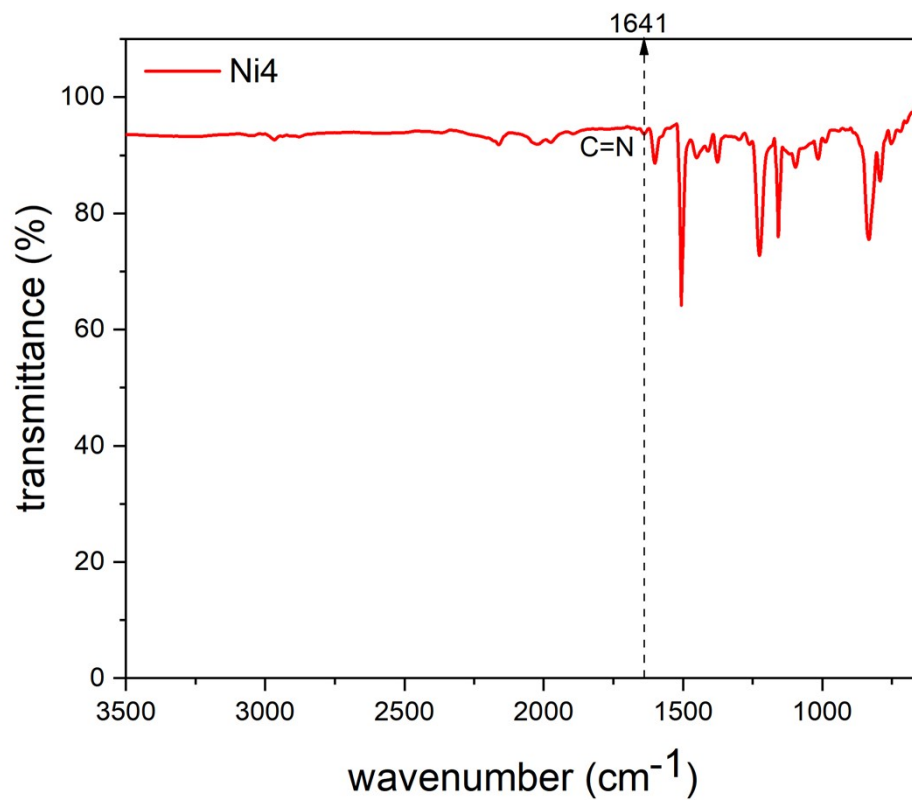

**Figure S19** FT-IR spectrum of Ni4

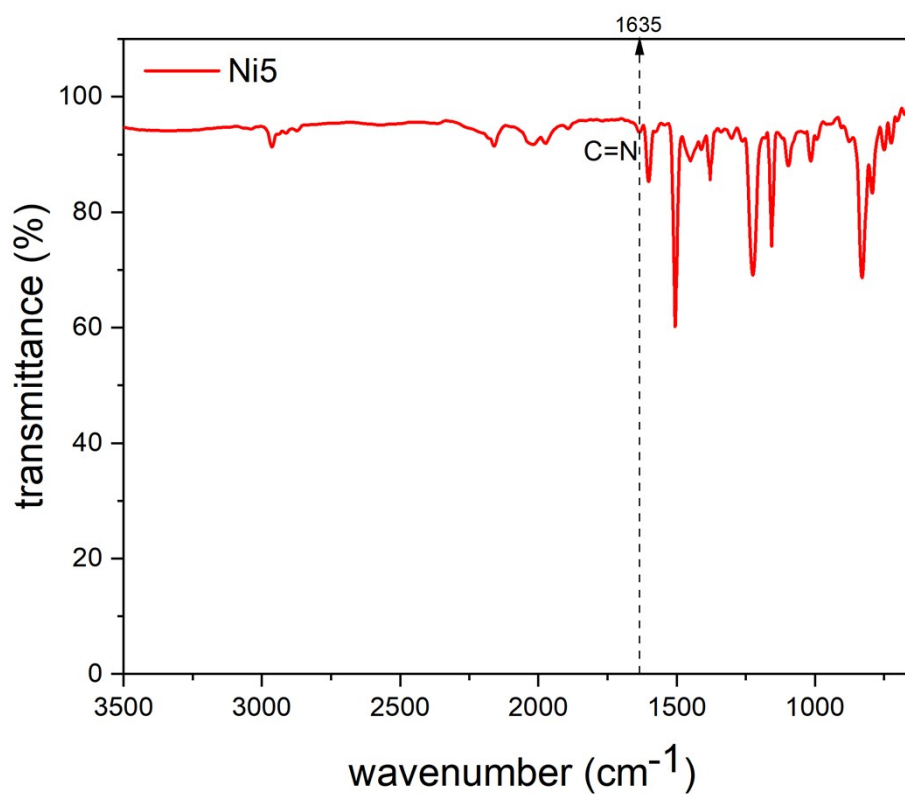

**Figure S20** FT-IR spectrum of Ni5

**$^1\text{H}$  NMR (470 MHz,  $\text{CDCl}_3$ , 25  $^\circ\text{C}$ ) spectra**

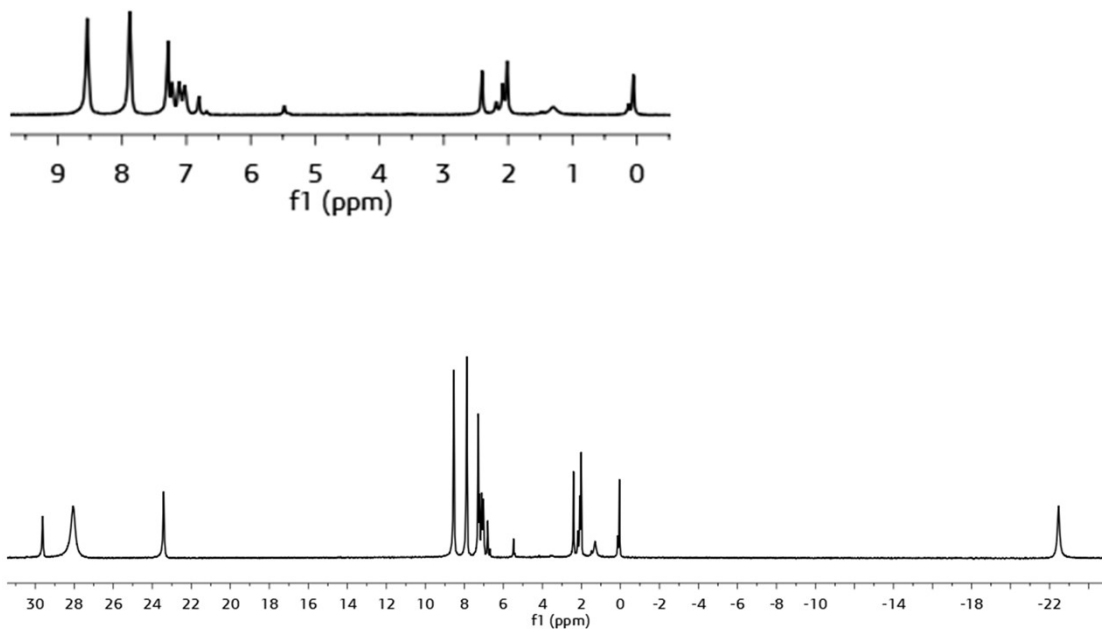

**Figure S21**  $^1\text{H}$  NMR spectrum of Ni1 along with an expansion of the  $\delta$  10.0 to 0.0 ppm region

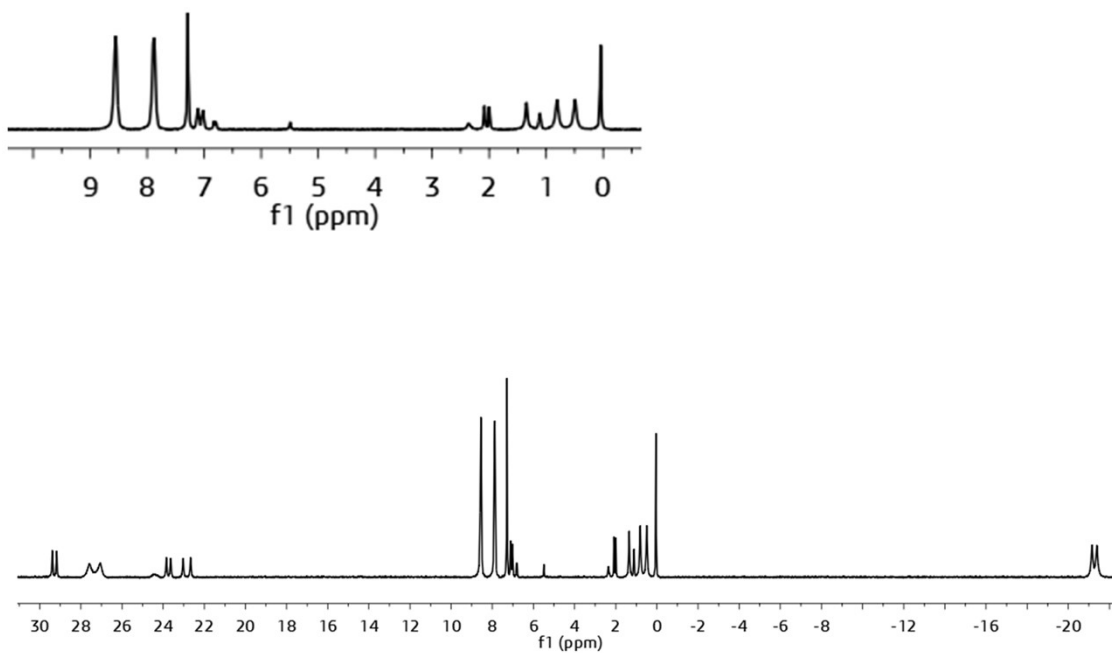

**Figure S22**  $^1\text{H}$  NMR spectrum of Ni2 along with an expansion of the  $\delta$  10.0 to 0.0 ppm region

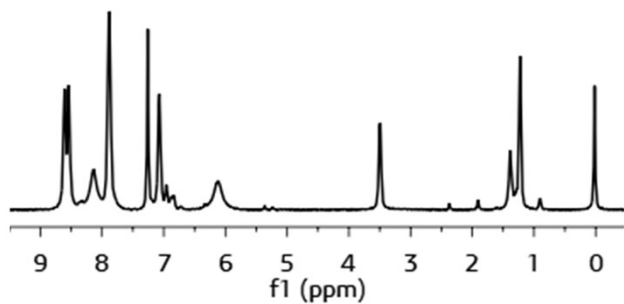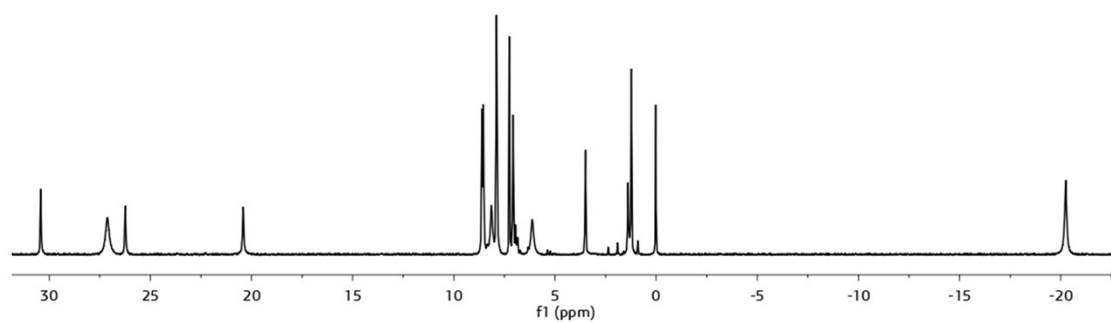

**Figure S23** <sup>1</sup>H NMR spectrum of Ni3 along with an expansion of the  $\delta$  10.0 to 0.0 ppm region

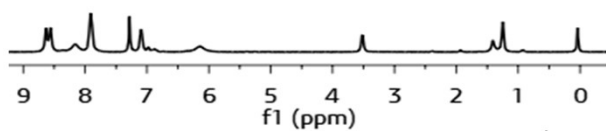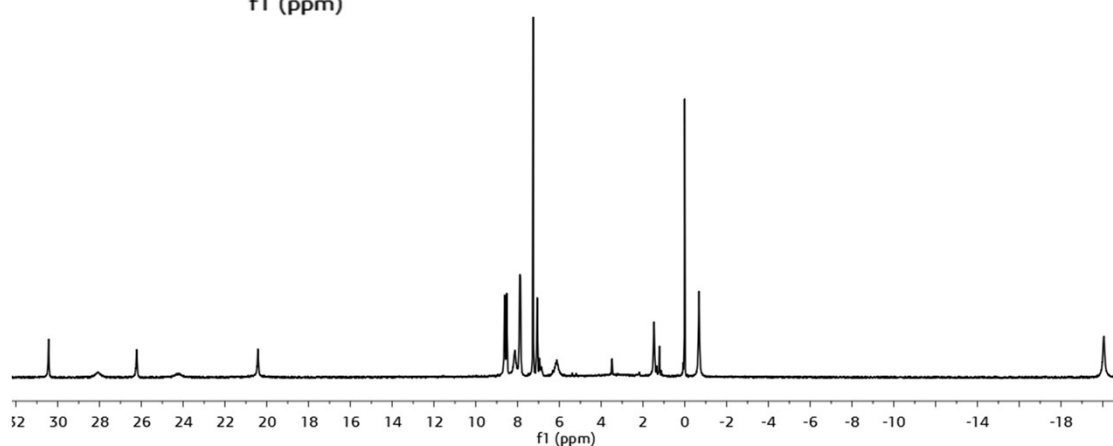

**Figure S24** <sup>1</sup>H NMR spectrum of Ni4 along with an expansion of the  $\delta$  10.0 to 0.0 ppm region

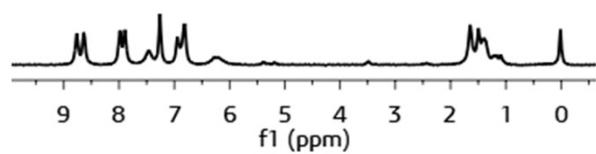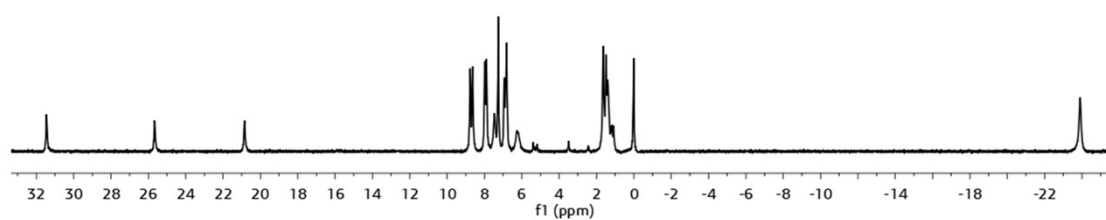

**Figure S25** <sup>1</sup>H NMR spectrum of **Ni5** along with an expansion of the  $\delta$  10.0 to 0.0 ppm region



**$^{19}\text{F}$  NMR (470 MHz,  $\text{CDCl}_3$ , 25 °C) spectra**

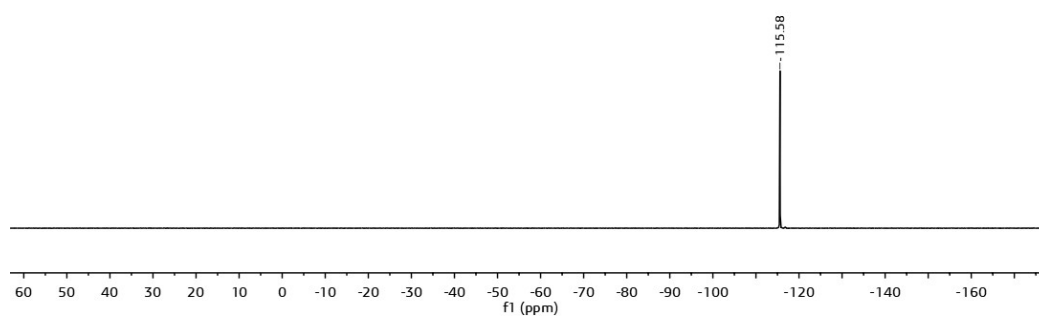

**Figure S26**  $^{19}\text{F}$  NMR spectrum of Ni1

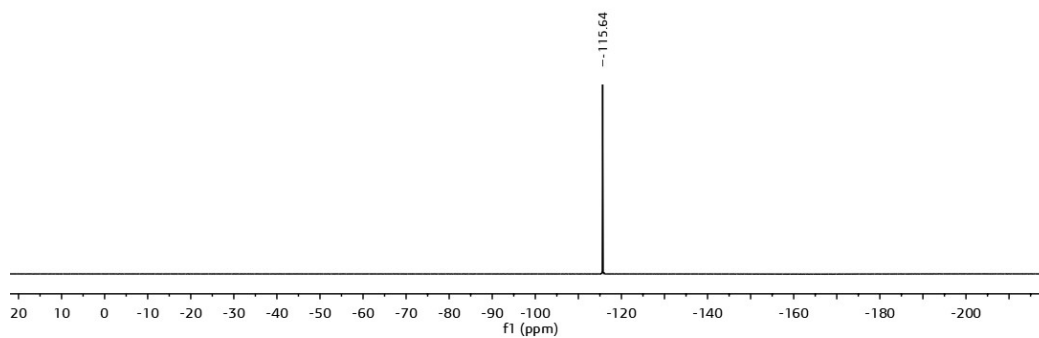

**Figure S27**  $^{19}\text{F}$  NMR spectrum of Ni2

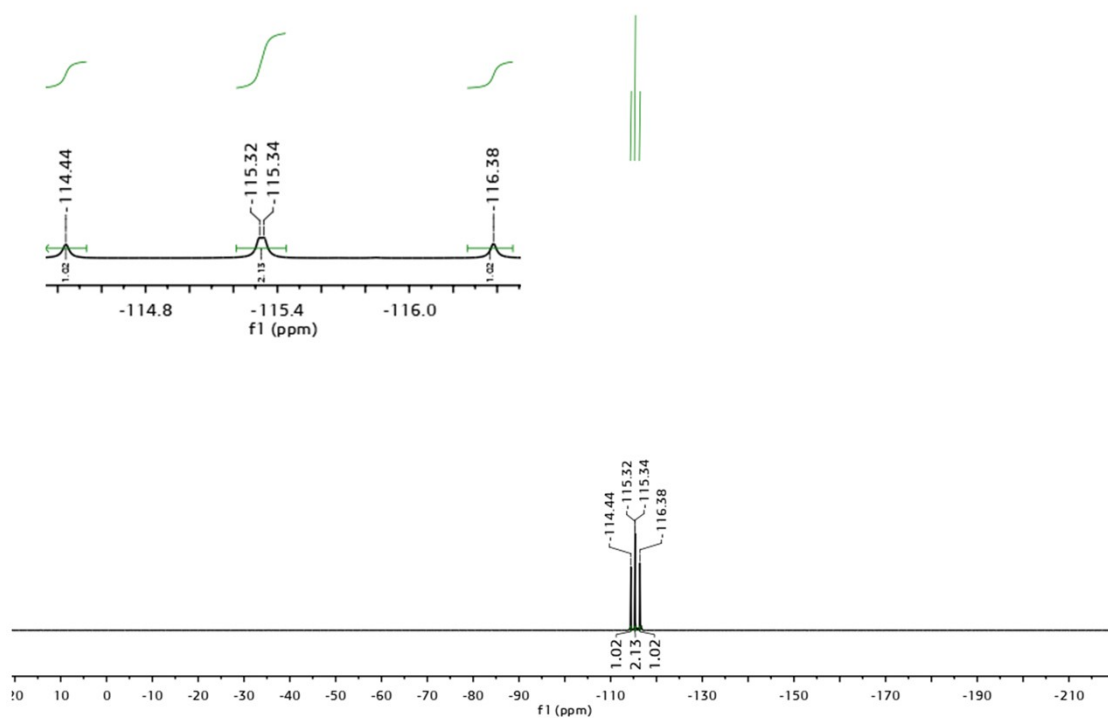

**Figure S28**  $^{19}\text{F}$  NMR spectrum of Ni3

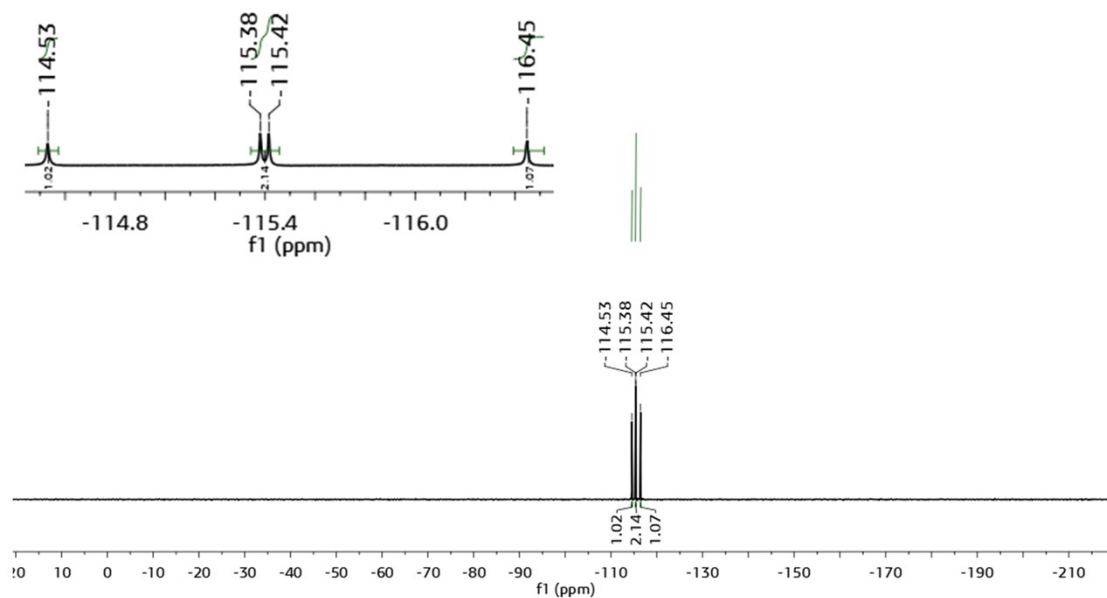

**Figure S29**  $^{19}\text{F}$  NMR spectrum of Ni4

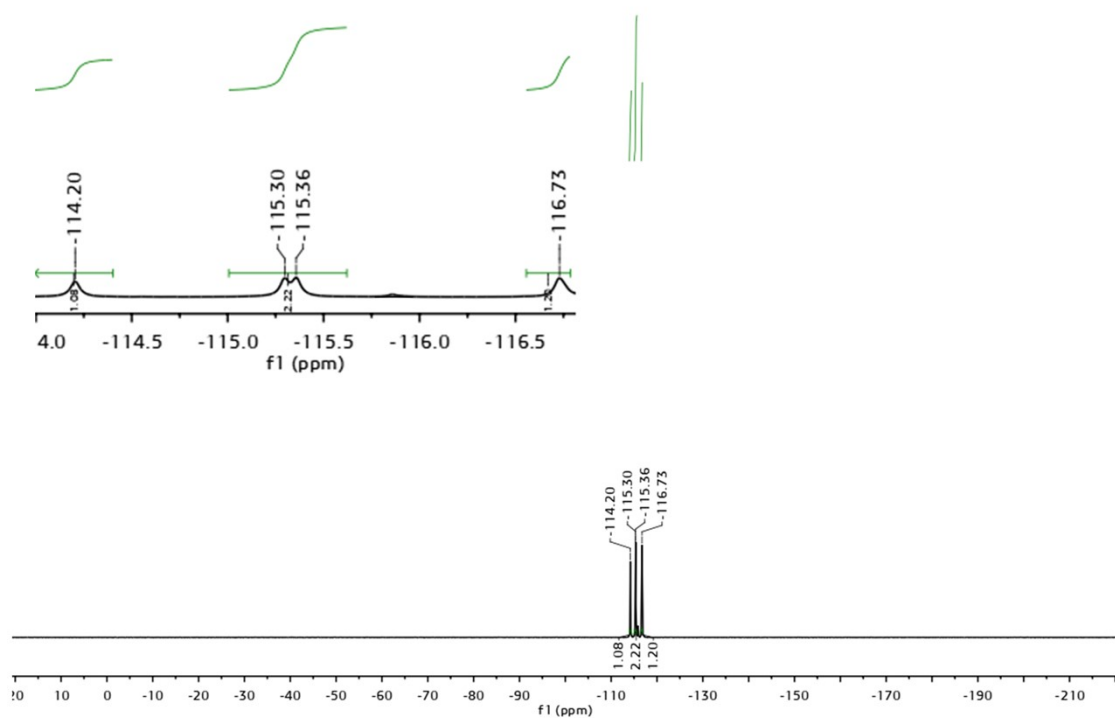

**Figure S30**  $^{19}\text{F}$  NMR spectrum of Ni5

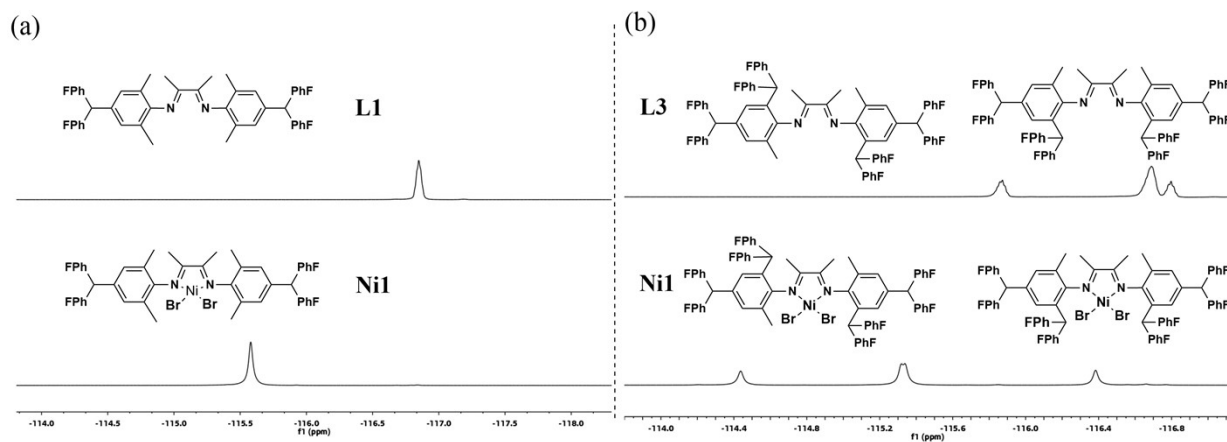

**Figure S31**  $^{19}\text{F}$  NMR spectra of a) L1 and its nickel complex Ni1 along with that for b) L3 and Ni3.

## GPC traces for the polyethylenes

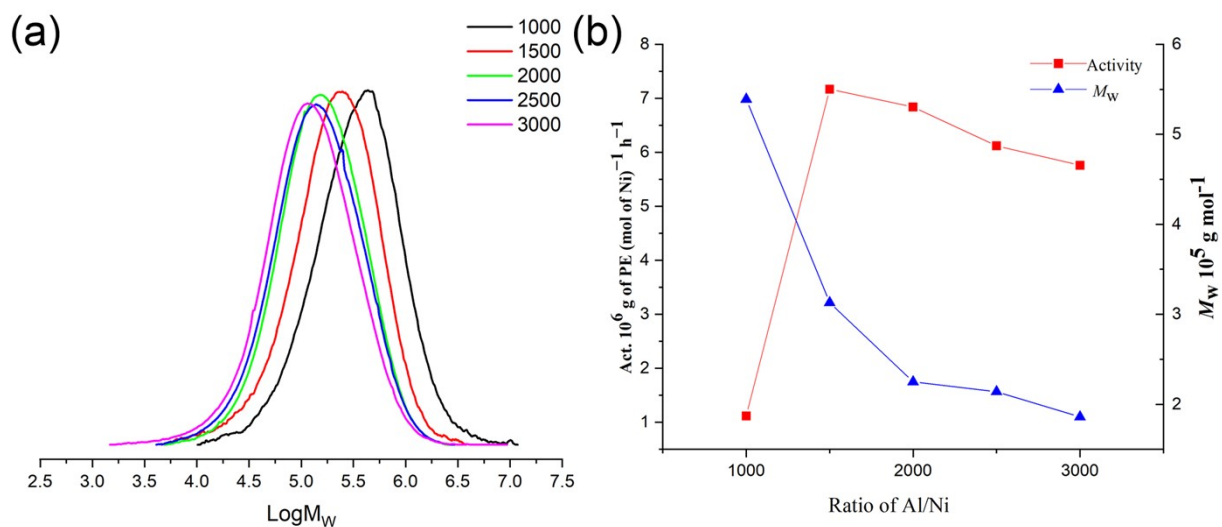

**Figure S32** a) GPC traces and b) plots of catalytic activity and molecular weight of the polyethylene produced using Ni2/MAO at different Al:Ni molar ratios (entries 1 – 5, Table 3).

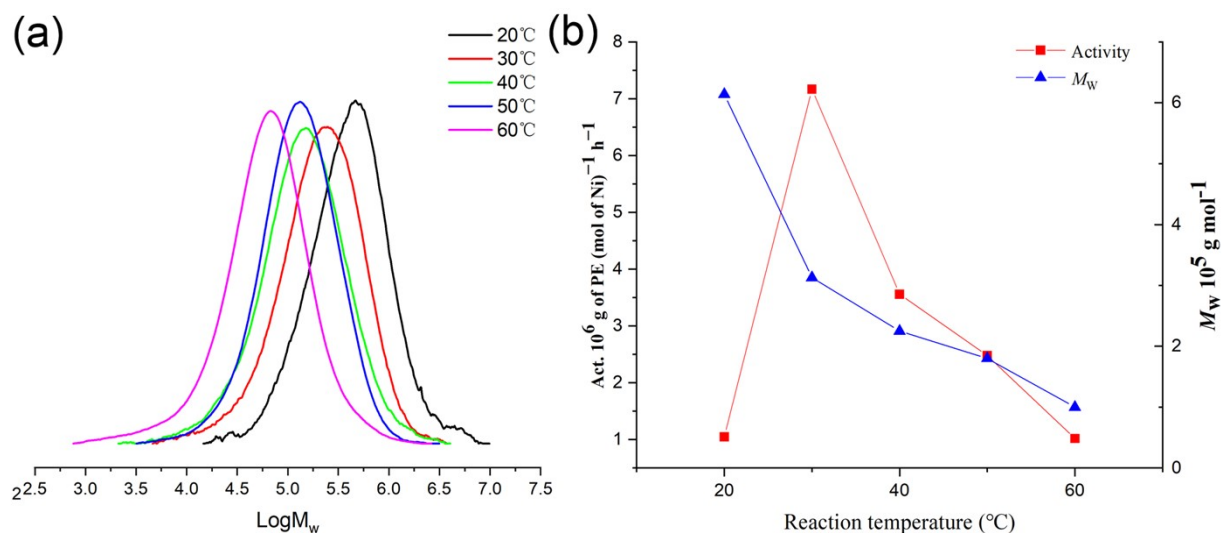

**Figure S33** a) GPC traces and b) plots of catalytic activity and molecular weight of the polyethylene produced using Ni2/MAO at various run temperatures (entries 2 and 6 – 9, Table 3).

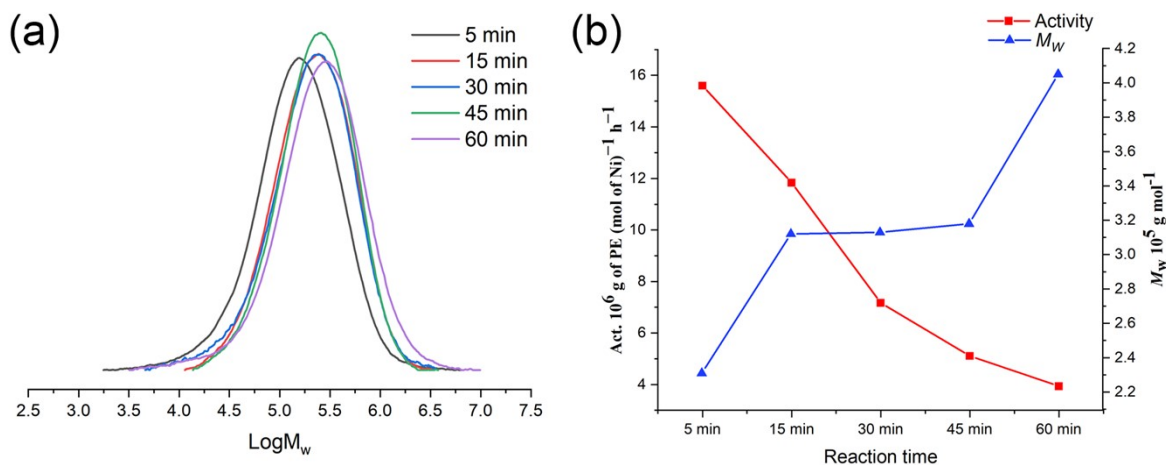

**Figure S34** a) GPC traces and b) plots of catalytic activity and molecular weight of the polyethylene produced using Ni2/MAO at various time (entries 2 and 10-13, Table 3).

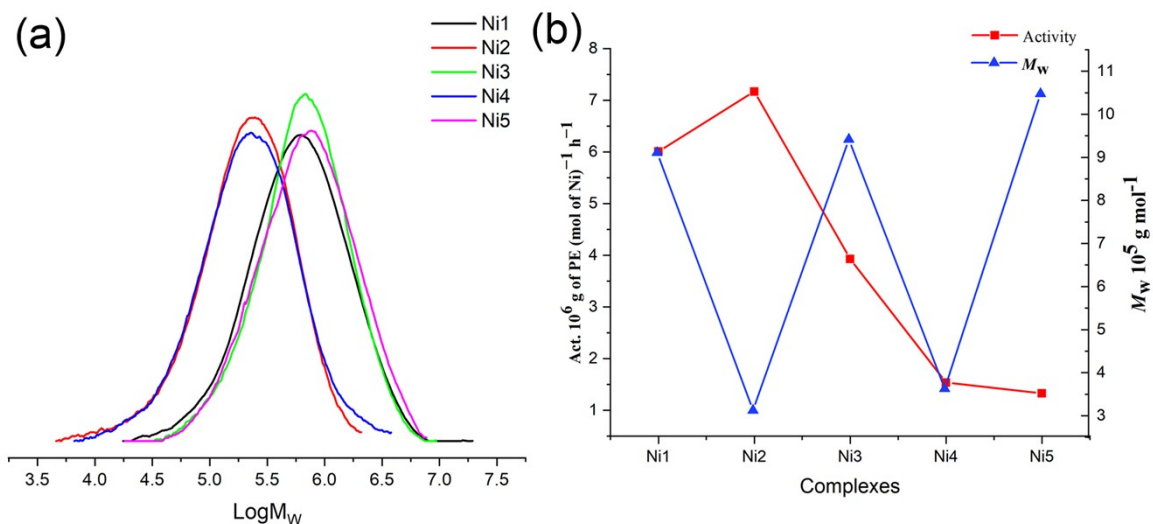

**Figure S35** a) GPC traces and b) plots of catalytic activity and molecular weight of the polyethylene produced using Ni1 – Ni5 in combination with MAO (entries 2 and 16 – 19, Table 3).

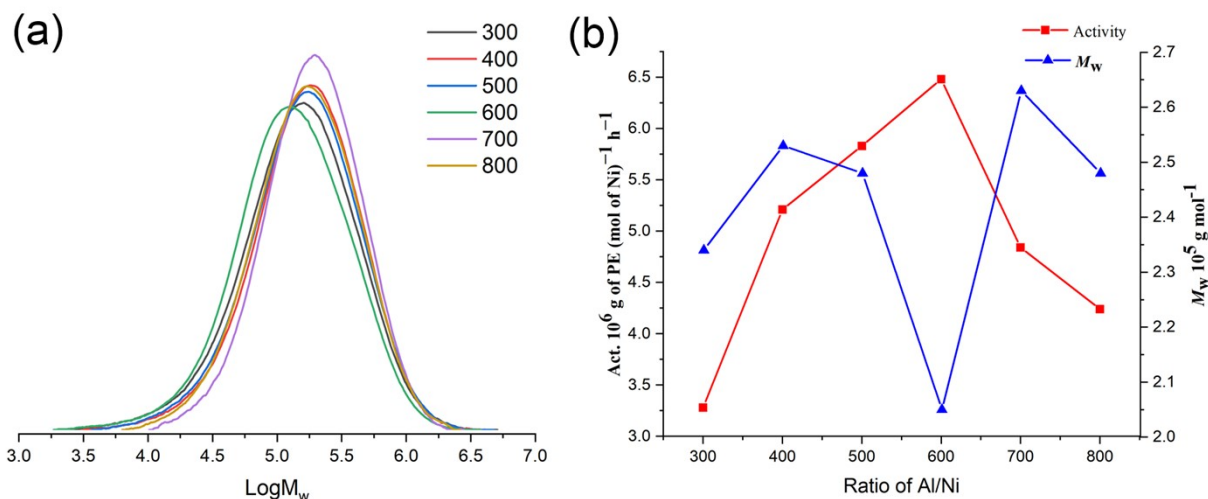

**Figure S36** a) GPC traces and b) plots of catalytic activity and molecular weight of the polyethylene produced using Ni<sub>2</sub>/ EtAlCl<sub>2</sub> at different Al:Ni molar ratios (entries 1-6, Table 4)

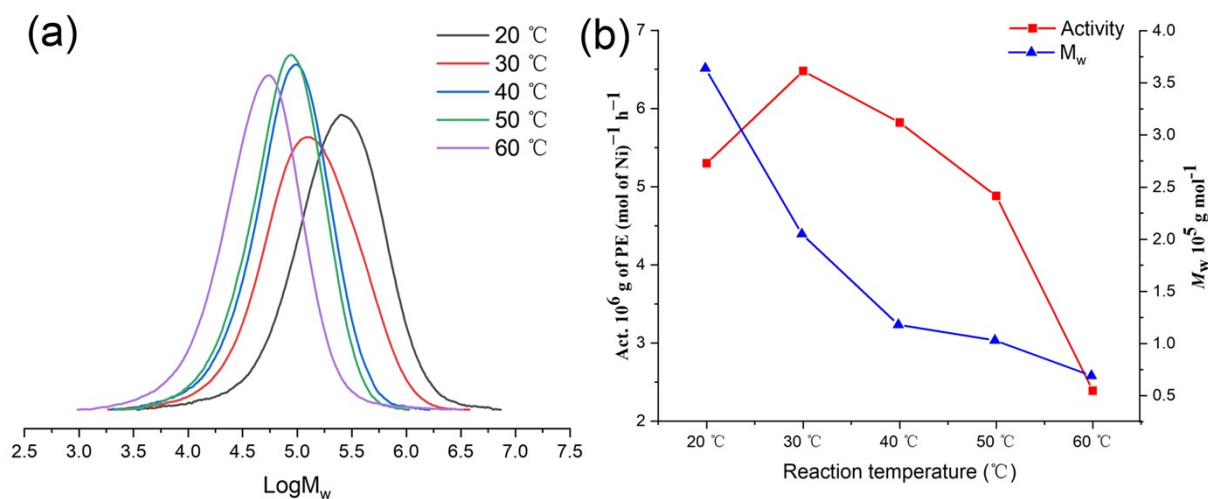

**Figure S37** a) GPC traces and b) plots of catalytic activity and molecular weight of the polyethylene produced using Ni<sub>2</sub>/ EtAlCl<sub>2</sub> at different run temperatures (entries 4 and 7-10, Table 4)

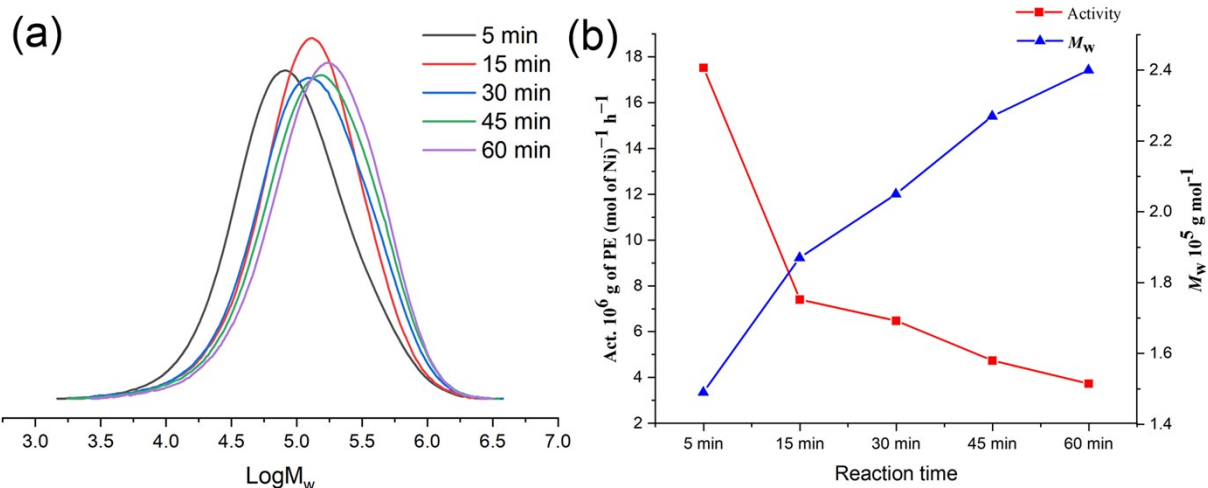

**Figure S38** a) GPC traces and b) plots of catalytic activity and molecular weight of the polyethylene produced using Ni2/ EtAlCl<sub>2</sub> at different run time (entries 4 and 7-10, Table4)

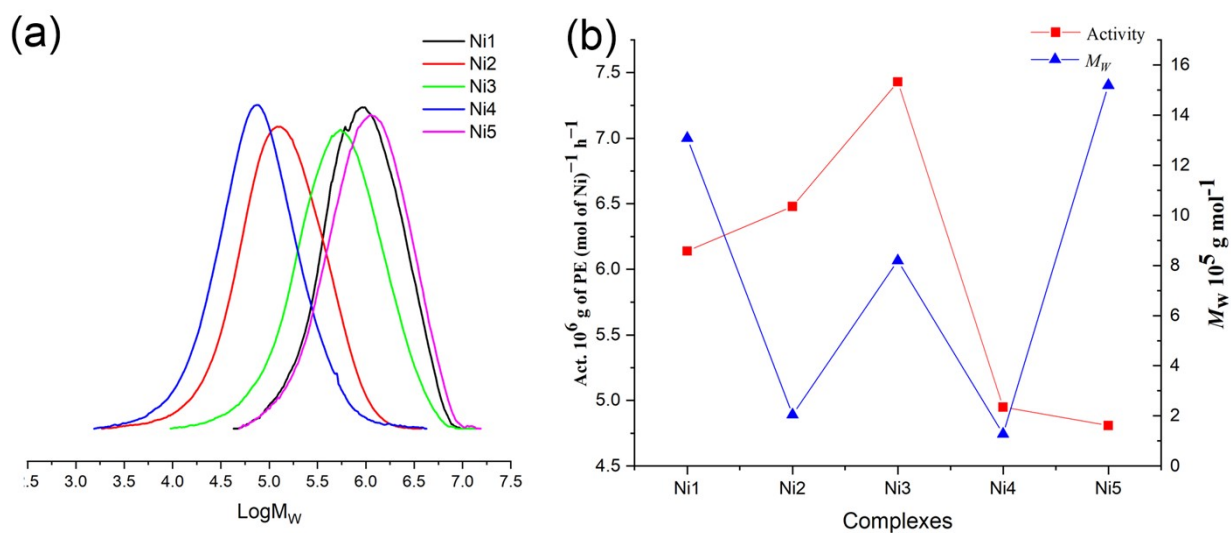

**Figure S39** a) GPC traces and b) plots of the catalytic activity and molecular weight of the polyethylene produced using Ni1 – Ni5 in combination with EtAlCl<sub>2</sub> (entries 2 and 17 – 20, Table 4).

**<sup>13</sup>C NMR (470 MHz, chlorobenzene-*d*<sub>5</sub>, 100 °C) spectra**

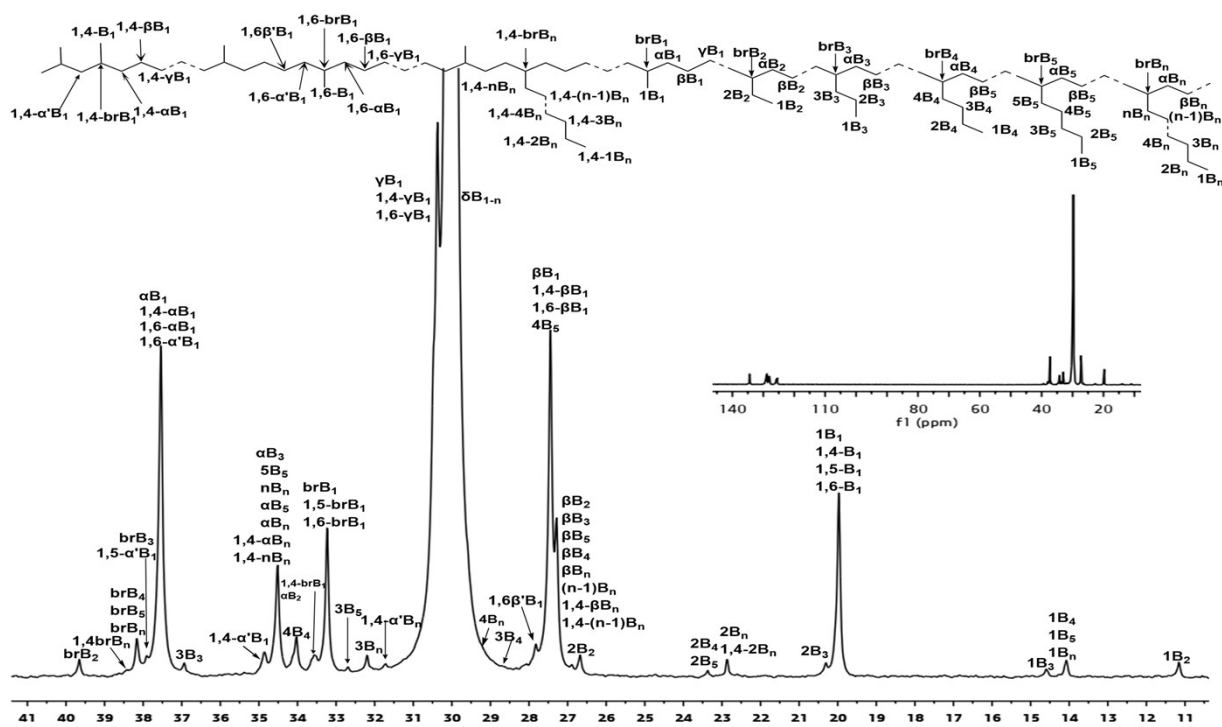

**Figure S40**  $^{13}\text{C}$  NMR spectrum of PE-MAO30Ni2 produced using Ni2/MAO (entry 2, Table 3)

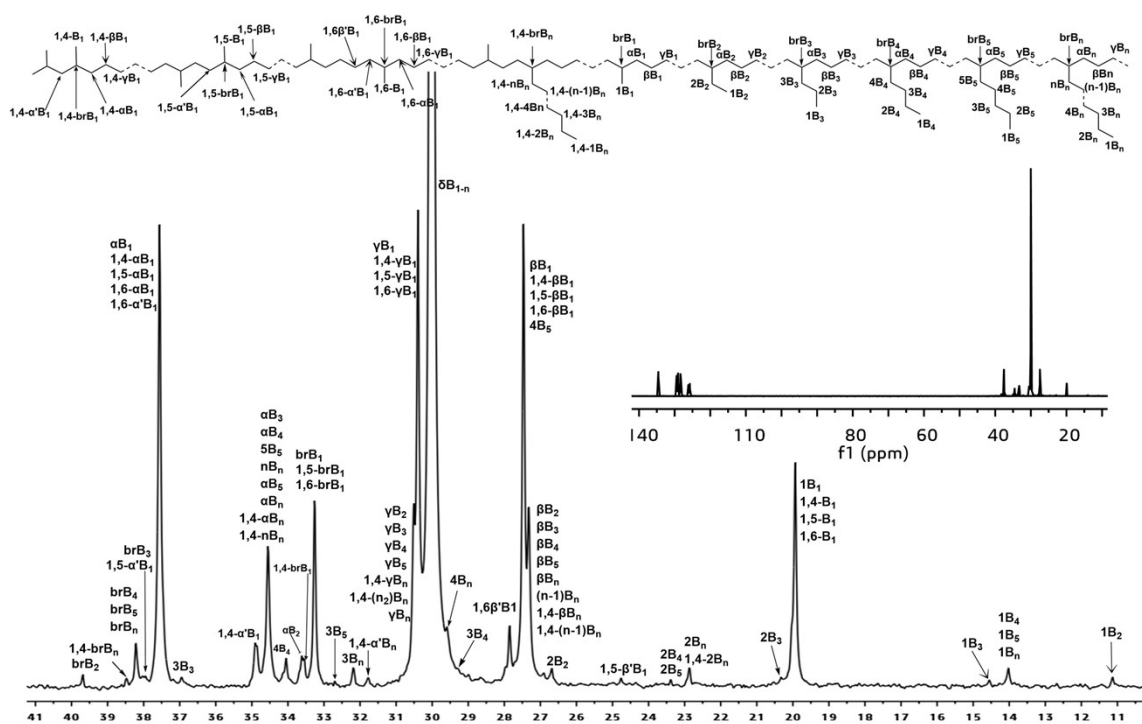

**Figure S41**  $^{13}\text{C}$  NMR spectrum of PE-EtAlCl<sub>2</sub>40Ni5 produced using Ni5/EtAlCl<sub>2</sub> (entry 21, Table 4)

$^{13}\text{C}$  NMR (470 MHz, *o*-dichlorobenzene-*d*<sub>4</sub>, 100 °C) spectra



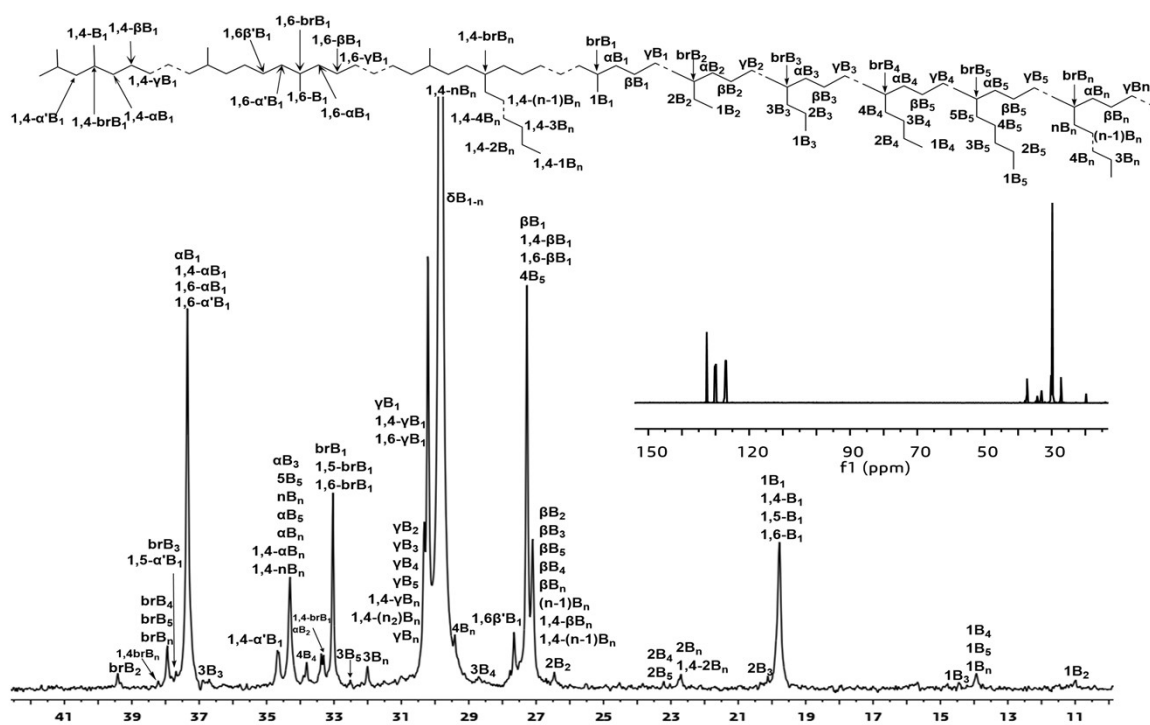

**Figure S42**  $^{13}\text{C}$  NMR spectrum of PE-Et<sub>2</sub>AlCl<sub>40</sub>Ni<sub>5</sub> produced using Ni<sub>5</sub>/Et<sub>2</sub>AlCl (entry 23, Table 4)

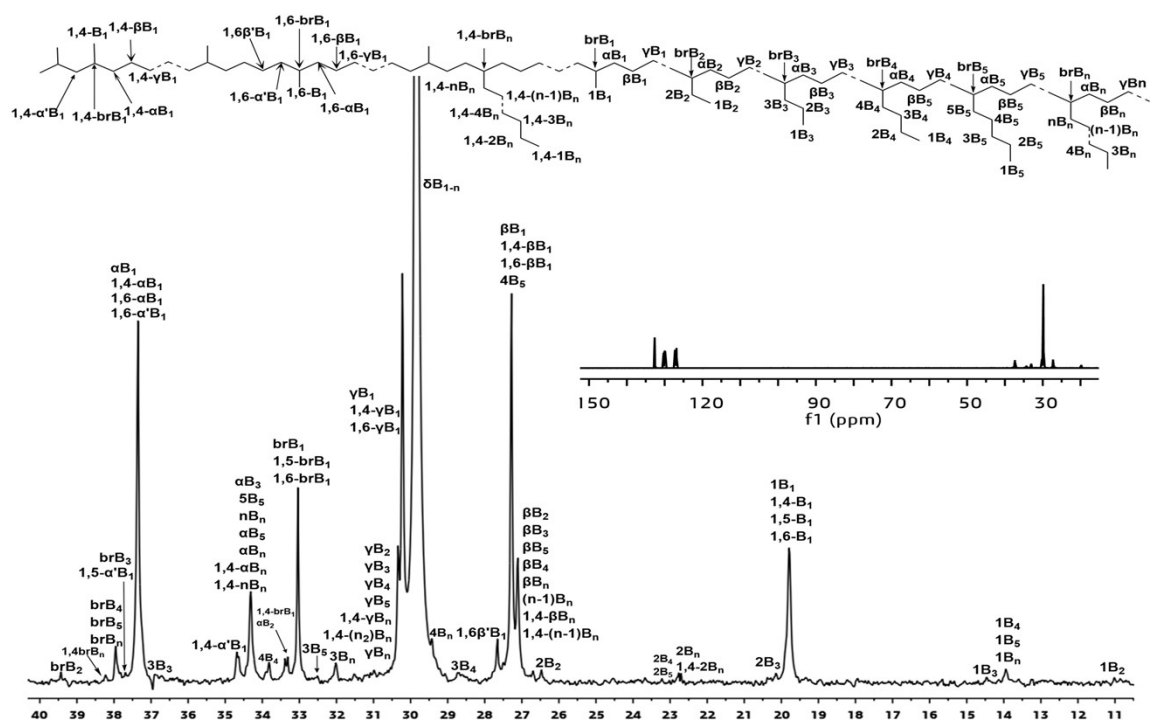

**Figure S43**  $^{13}\text{C}$  NMR spectrum of PE-EASC<sub>40</sub>Ni<sub>5</sub> produced using Ni<sub>5</sub>/EASC (entry 24, Table 4)

**Stress-strain recovery test (performed at 30 °C)**

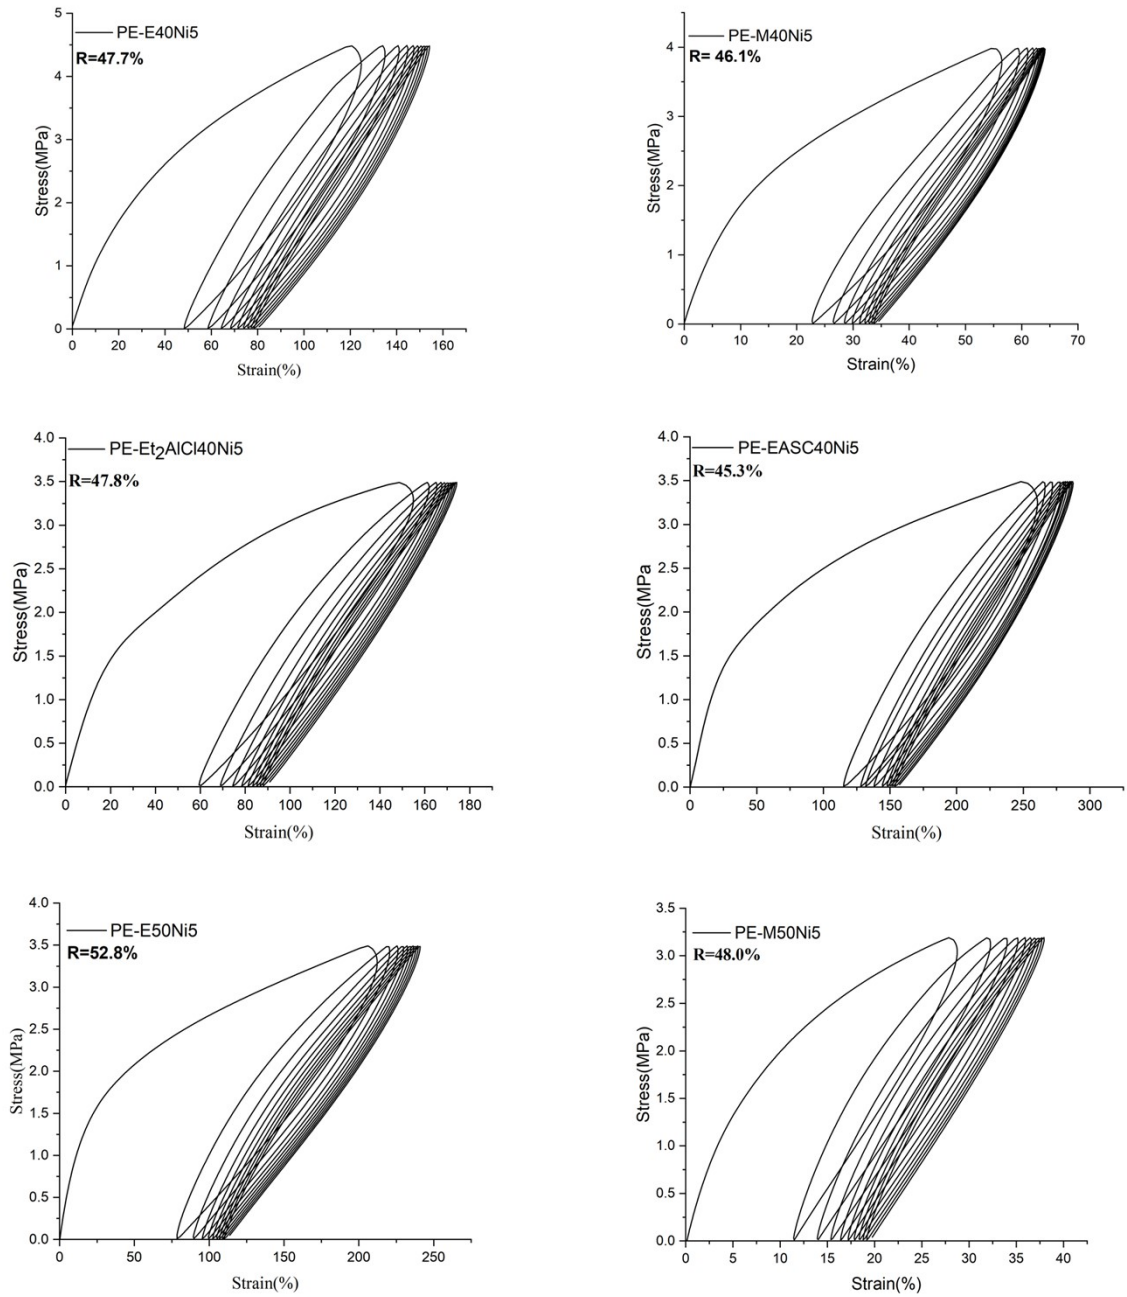

**Figure S44** Stress-strain recovery tests for samples PE-EtAlCl<sub>2</sub>40Ni<sub>5</sub>, PE-EtAlCl<sub>2</sub>50Ni<sub>5</sub>, PE-M40Ni<sub>5</sub>, PE-Et<sub>2</sub>AlCl<sub>4</sub>0Ni<sub>5</sub> and PE-EASC40Ni<sub>5</sub>

**Table S1** Crystal data and structure refinements for **L3**, **Ni1** and **Ni5**

|                                             | <b>Ni1</b>                                                       | <b>Ni5</b>                                                                                    | <b>L1</b>                                                                        |
|---------------------------------------------|------------------------------------------------------------------|-----------------------------------------------------------------------------------------------|----------------------------------------------------------------------------------|
| Empirical formula                           | C <sub>210</sub> H <sub>156</sub> F <sub>24</sub> N <sub>6</sub> | C <sub>92</sub> H <sub>81</sub> Br <sub>4</sub> F <sub>8</sub> N <sub>4</sub> Ni <sub>2</sub> | C <sub>74</sub> H <sub>60</sub> Br <sub>2</sub> F <sub>8</sub> N <sub>2</sub> Ni |
| Formula weight                              | 3219.40                                                          | 1831.67                                                                                       | 1347.77                                                                          |
| Temperature/K                               | 170.00(10)                                                       | 170.00(13)                                                                                    | 169.99(12)                                                                       |
| Crystal system                              | triclinic                                                        | triclinic                                                                                     | monoclinic                                                                       |
| Space group                                 | P-1                                                              | P-1                                                                                           | P2 <sub>1</sub> /n                                                               |
| a/Å                                         | 11.08370(10)                                                     | 15.1623(12)                                                                                   | 10.8443(4)                                                                       |
| b/Å                                         | 19.80860(10)                                                     | 15.6426(9)                                                                                    | 36.4718(12)                                                                      |
| c/Å                                         | 37.8410(3)                                                       | 18.6622(9)                                                                                    | 16.3540(7)                                                                       |
| α/°                                         | 89.0030(10)                                                      | 78.343(4)                                                                                     | 90                                                                               |
| β/°                                         | 84.9140(10)                                                      | 78.089(5)                                                                                     | 106.635(4)                                                                       |
| γ/°                                         | 83.4140(10)                                                      | 78.104(6)                                                                                     | 90                                                                               |
| Volume/Å <sup>3</sup>                       | 8220.55(11)                                                      | 4178.7(5)                                                                                     | 6197.5(4)                                                                        |
| Z                                           | 2                                                                | 2                                                                                             | 4                                                                                |
| ρ <sub>calc</sub> /g/cm <sup>3</sup>        | 1.301                                                            | 1.456                                                                                         | 1.444                                                                            |
| μ/mm <sup>-1</sup>                          | 0.778                                                            | 3.337                                                                                         | 2.542                                                                            |
| F(000)                                      | 3348.0                                                           | 1858.0                                                                                        | 2752.0                                                                           |
| Crystal size/mm <sup>3</sup>                | 0.2 × 0.15 × 0.1                                                 | 0.1 × 0.05 × 0.02                                                                             | 0.3 × 0.1 × 0.02                                                                 |
| Radiation                                   | Cu Kα (λ = 1.54184)                                              | Cu Kα (λ = 1.54184)                                                                           | Cu Kα (λ = 1.54184)                                                              |
| 2θ range for data collection/°              | 4.49 to 150.728                                                  | 4.908 to 133.2                                                                                | 4.846 to 151.324                                                                 |
| Index ranges                                | -13 ≤ h ≤ 13, -24 ≤ k ≤ 24, -47 ≤ l ≤ 41                         | -18 ≤ h ≤ 18, -18 ≤ k ≤ 18, -22 ≤ l ≤ 22                                                      | -12 ≤ h ≤ 13, -32 ≤ k ≤ 44, -20 ≤ l ≤ 20                                         |
| Reflections collected                       | 120556                                                           | 55023                                                                                         | 46177                                                                            |
| Independent reflections                     | 32478 [R <sub>int</sub> = 0.0293, R <sub>sigma</sub> = 0.0299]   | 14739 [R <sub>int</sub> = 0.1001, R <sub>sigma</sub> = 0.0840]                                | 12209 [R <sub>int</sub> = 0.1010, R <sub>sigma</sub> = 0.0654]                   |
| Data/restraints/parameters                  | 32478/0/2173                                                     | 14739/1068/1200                                                                               | 12209/0/790                                                                      |
| Goodness-of-fit on F <sup>2</sup>           | 1.281                                                            | 1.344                                                                                         | 0.998                                                                            |
| Final R indexes [I ≥ 2σ (I)]                | R <sub>1</sub> = 0.1097, wR <sub>2</sub> = 0.2897                | R <sub>1</sub> = 0.1352, wR <sub>2</sub> = 0.3446                                             | R <sub>1</sub> = 0.1343, wR <sub>2</sub> = 0.3939                                |
| Final R indexes [all data]                  | R <sub>1</sub> = 0.1223, wR <sub>2</sub> = 0.3090                | R <sub>1</sub> = 0.1802, wR <sub>2</sub> = 0.3816                                             | R <sub>1</sub> = 0.1634, wR <sub>2</sub> = 0.4189                                |
| Largest diff. peak/hole / e Å <sup>-3</sup> | 1.37/-0.55                                                       | 2.88/-0.96                                                                                    | 3.39/-1.02                                                                       |
